# Supplementary material for: New eremophilane derivatives produced by the marine-derived fungus <em>Emericellopsis maritima</em> BC17 in liquid culture media
Source: Preprints.org preprint supplement (doi:10.20944/preprints202401.1758.v1), 2024-01-25
Supplement: Supplementary file 1 [file supplementary]

# **New eremophilane derivatives produced by the marine-derived fungus *Emericellopsis maritima* BC17 in liquid culture media**

Jorge R. Virués-Segovia<sup>1,2</sup>, Cristina Pinedo<sup>1,2</sup>, David Zorrilla<sup>3</sup>, Jesús Sánchez-Márquez<sup>3</sup>, Pilar Sánchez<sup>4</sup>, María C. Ramos<sup>4</sup>, Mercedes de la Cruz<sup>4</sup>, Josefina Aleu<sup>1,2,\*</sup>, and Rosa Durán-Patrón<sup>1,2,\*</sup>

<sup>1</sup> *Departamento de Química Orgánica, Facultad de Ciencias, Universidad de Cádiz, Puerto Real, 11510 Cádiz, Spain.*

<sup>2</sup> *Instituto de Investigación en Biomoléculas (INBIO), Universidad de Cádiz, Puerto Real, 11510 Cádiz, Spain.*

<sup>2</sup> *Departamento de Química Física, Facultad de Ciencias, Universidad de Cádiz, Puerto Real, 11510 Cádiz, Spain.*

<sup>3</sup> *Centro de Excelencia en Investigación de Medicamentos Innovadores en Andalucía, Fundación MEDINA, 18016 Granada, Spain.*

\* Correspondence: [josefina.aleu@uca.es](mailto:josefina.aleu@uca.es) (J.A.), [rosa.duran@uca.es](mailto:rosa.duran@uca.es) (R.D.-P.)

## Table of contents

|                                                                                                              |    |
|--------------------------------------------------------------------------------------------------------------|----|
| <b>Figure S1.</b> $^1\text{H}$ NMR spectrum (500 MHz, $\text{CD}_3\text{OD}$ ) of compound <b>1</b> .....    | 3  |
| <b>Figure S2.</b> $^{13}\text{C}$ NMR spectrum (125 MHz, $\text{CD}_3\text{OD}$ ) of compound <b>1</b> ..... | 4  |
| <b>Figure S3.</b> gCOSY spectrum of compound <b>1</b> .....                                                  | 5  |
| <b>Figure S4.</b> gHSQC spectrum of compound <b>1</b> .....                                                  | 6  |
| <b>Figure S5.</b> gHMBC spectrum of compound <b>1</b> .....                                                  | 7  |
| <b>Figure S6a-g.</b> 1D NOESY spectra of compound <b>1</b> .....                                             | 8  |
| <b>Figure S7.</b> HRESIMS spectrum of compound <b>1</b> .....                                                | 15 |
| <b>Figure S8.</b> $^1\text{H}$ NMR spectrum (400 MHz, $\text{CDCl}_3$ ) of compound <b>2</b> .....           | 16 |
| <b>Figure S9.</b> $^{13}\text{C}$ NMR spectrum (125 MHz, $\text{CDCl}_3$ ) of compound <b>2</b> .....        | 17 |
| <b>Figure S10.</b> gCOSY spectrum of compound <b>2</b> .....                                                 | 18 |
| <b>Figure S11.</b> gHSQC spectrum of compound <b>2</b> .....                                                 | 19 |
| <b>Figure S12.</b> gHMBC spectrum of compound <b>2</b> .....                                                 | 20 |
| <b>Figure S13a-f.</b> 1D NOESY spectra of compound <b>2</b> .....                                            | 21 |
| <b>Figure S14.</b> HRESIMS spectrum of compound <b>2</b> .....                                               | 27 |
| <b>Figure S15.</b> $^1\text{H}$ NMR spectrum (500 MHz, $\text{CDCl}_3$ ) of compound <b>3</b> .....          | 28 |
| <b>Figure S16.</b> $^{13}\text{C}$ NMR spectrum (125 MHz, $\text{CDCl}_3$ ) of compound <b>3</b> .....       | 29 |
| <b>Figure S17.</b> gCOSY spectrum of compound <b>3</b> .....                                                 | 30 |
| <b>Figure S18.</b> gHSQC spectrum of compound <b>3</b> .....                                                 | 31 |
| <b>Figure S19.</b> gHMBC spectrum of compound <b>3</b> .....                                                 | 32 |
| <b>Figure S20a-e.</b> 1D NOESY spectra of compound <b>3</b> .....                                            | 33 |
| <b>Figure S21.</b> HRESIMS spectrum of compound <b>3</b> .....                                               | 38 |

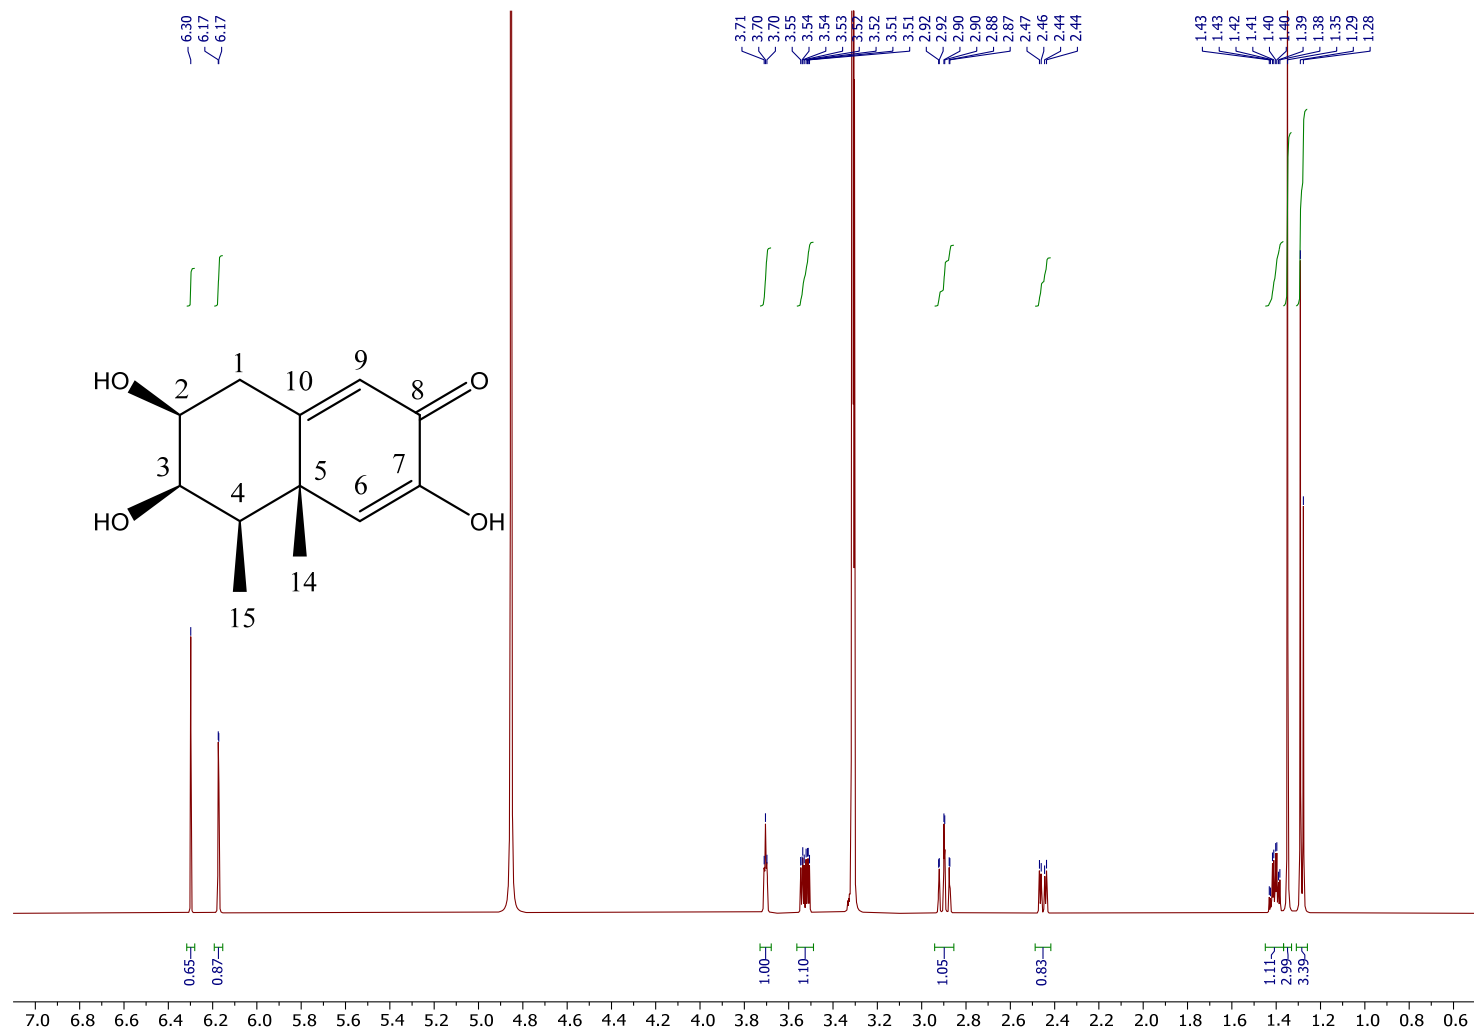

**Figure S1.**  $^1\text{H}$  NMR spectrum (500 MHz,  $\text{CD}_3\text{OD}$ ) of compound 1.

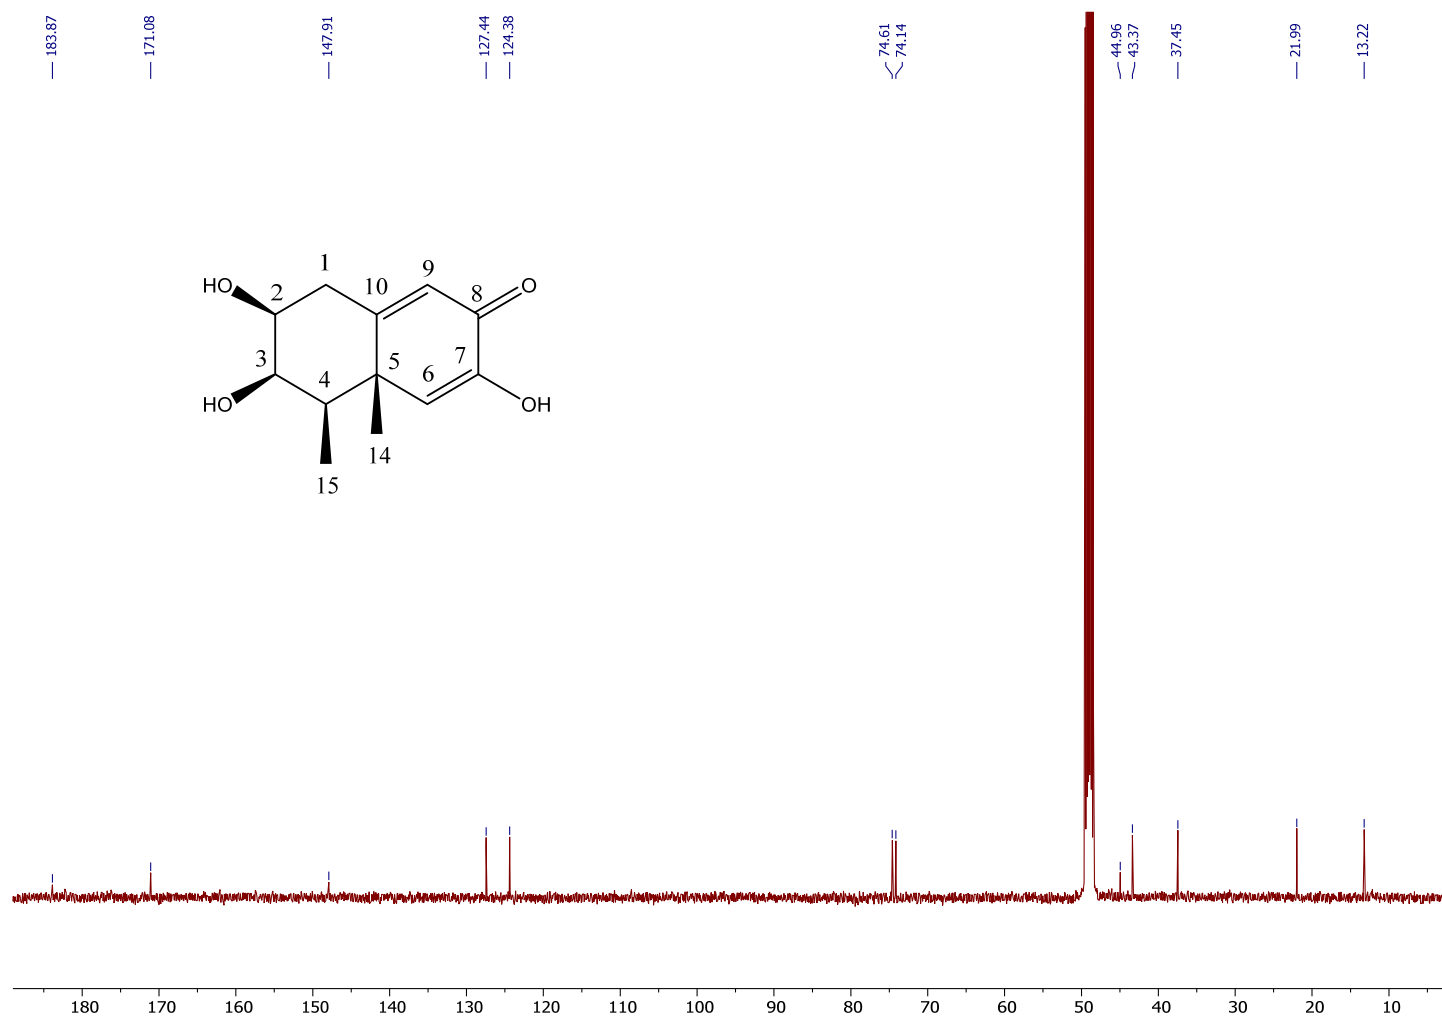

**Figure S2.** <sup>13</sup>C NMR spectrum (125 MHz, CD<sub>3</sub>OD) of compound **1**.



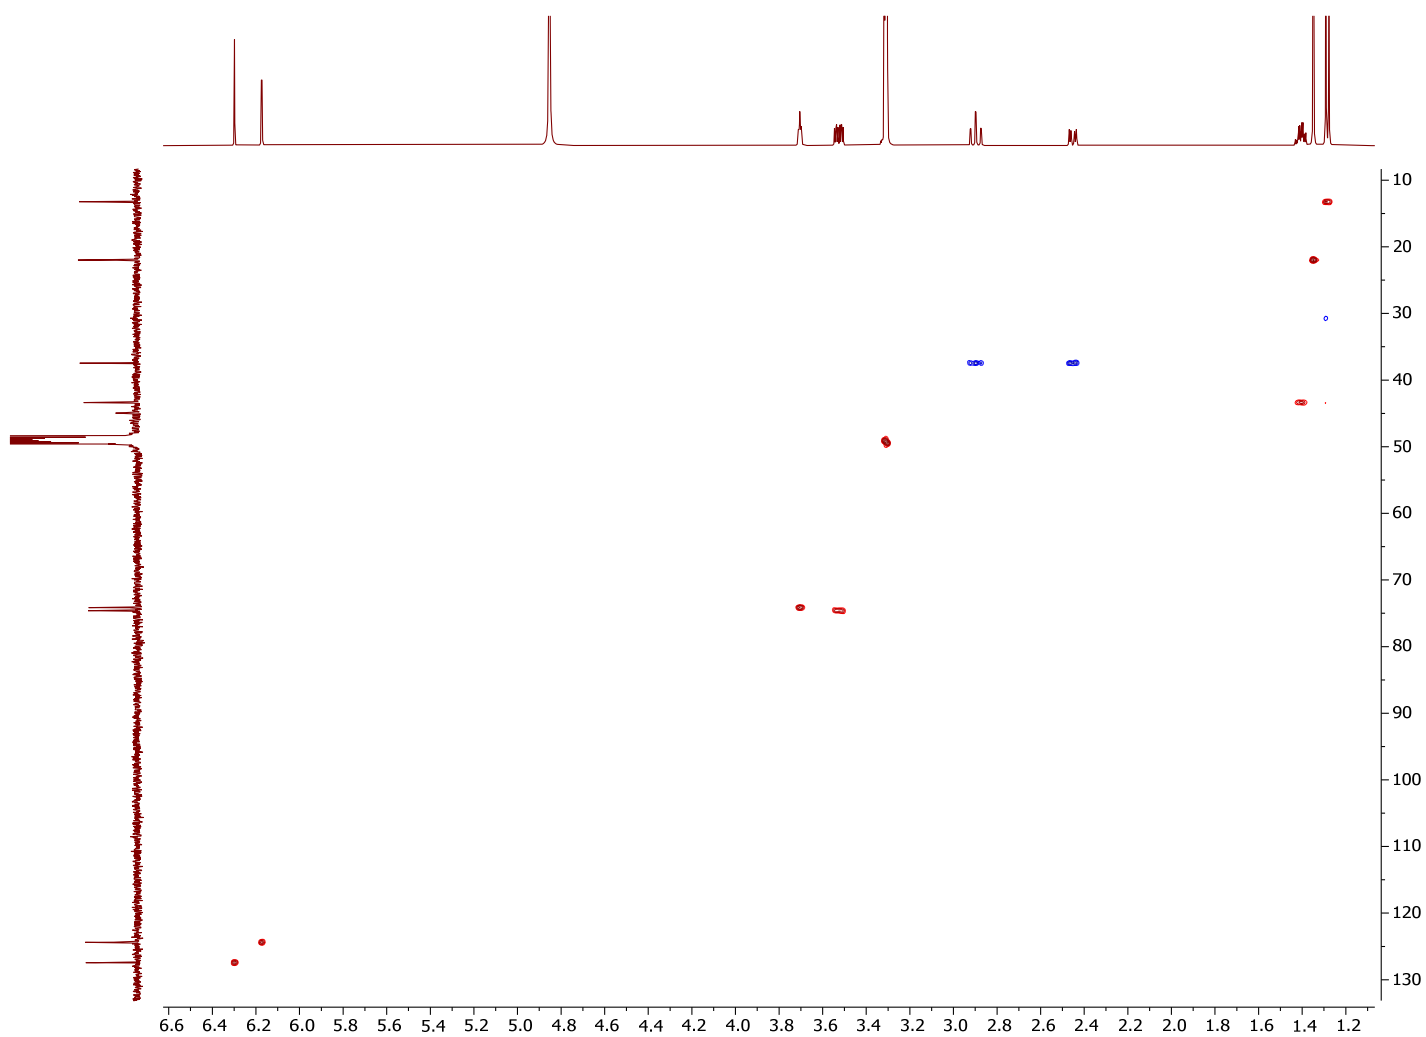

**Figure S4.** gHSQC spectrum of compound **1**.

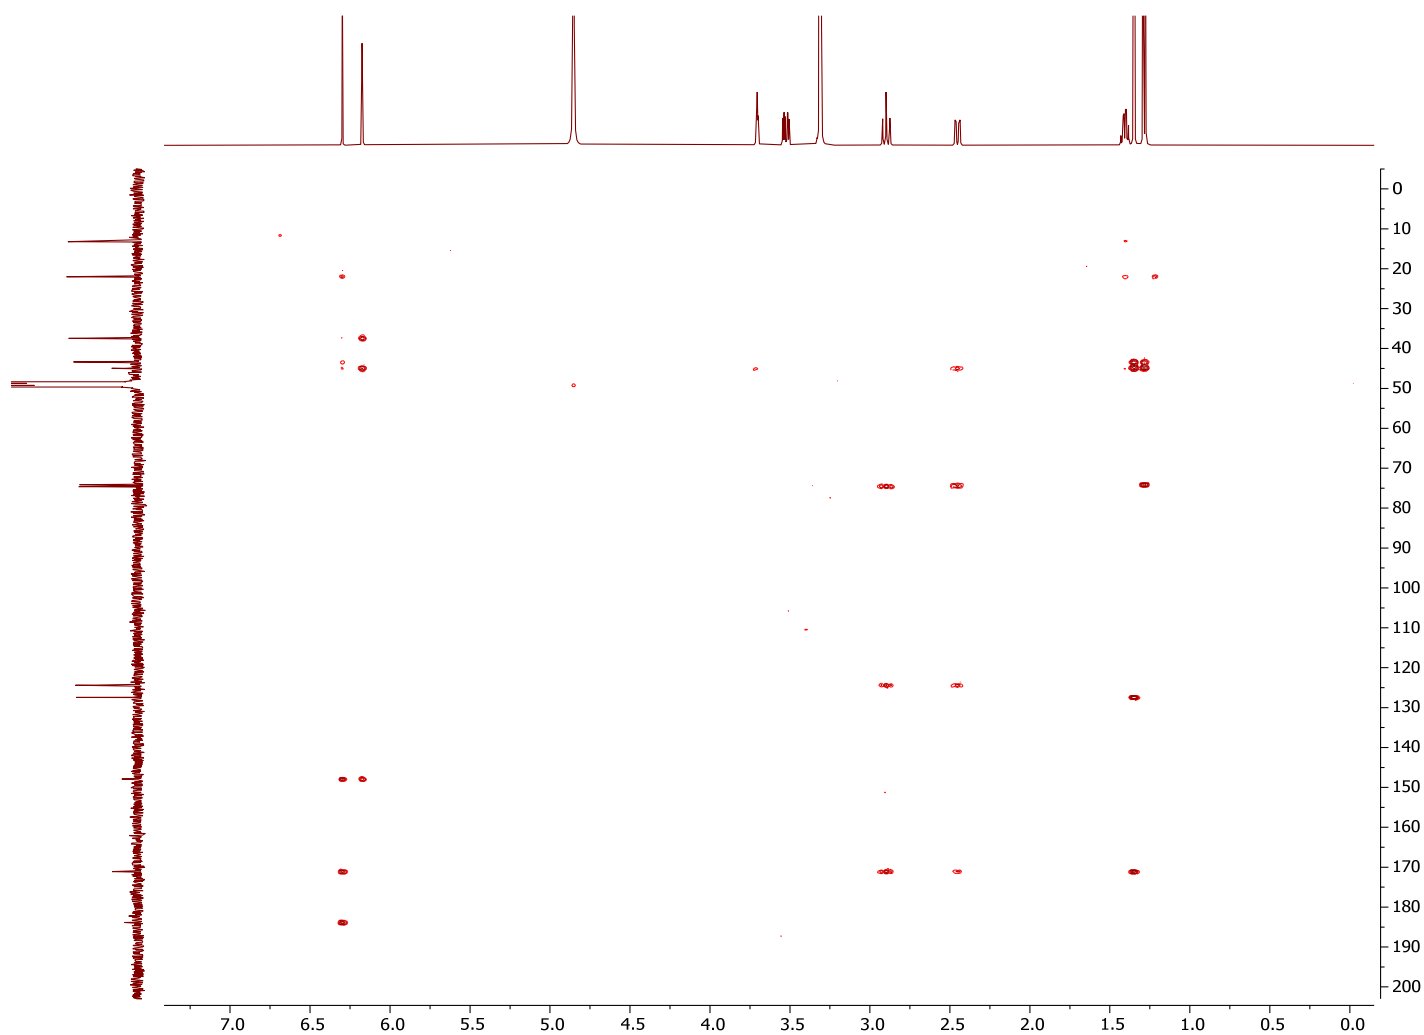

**Figure S5.** gHMBC spectrum of compound **1**.

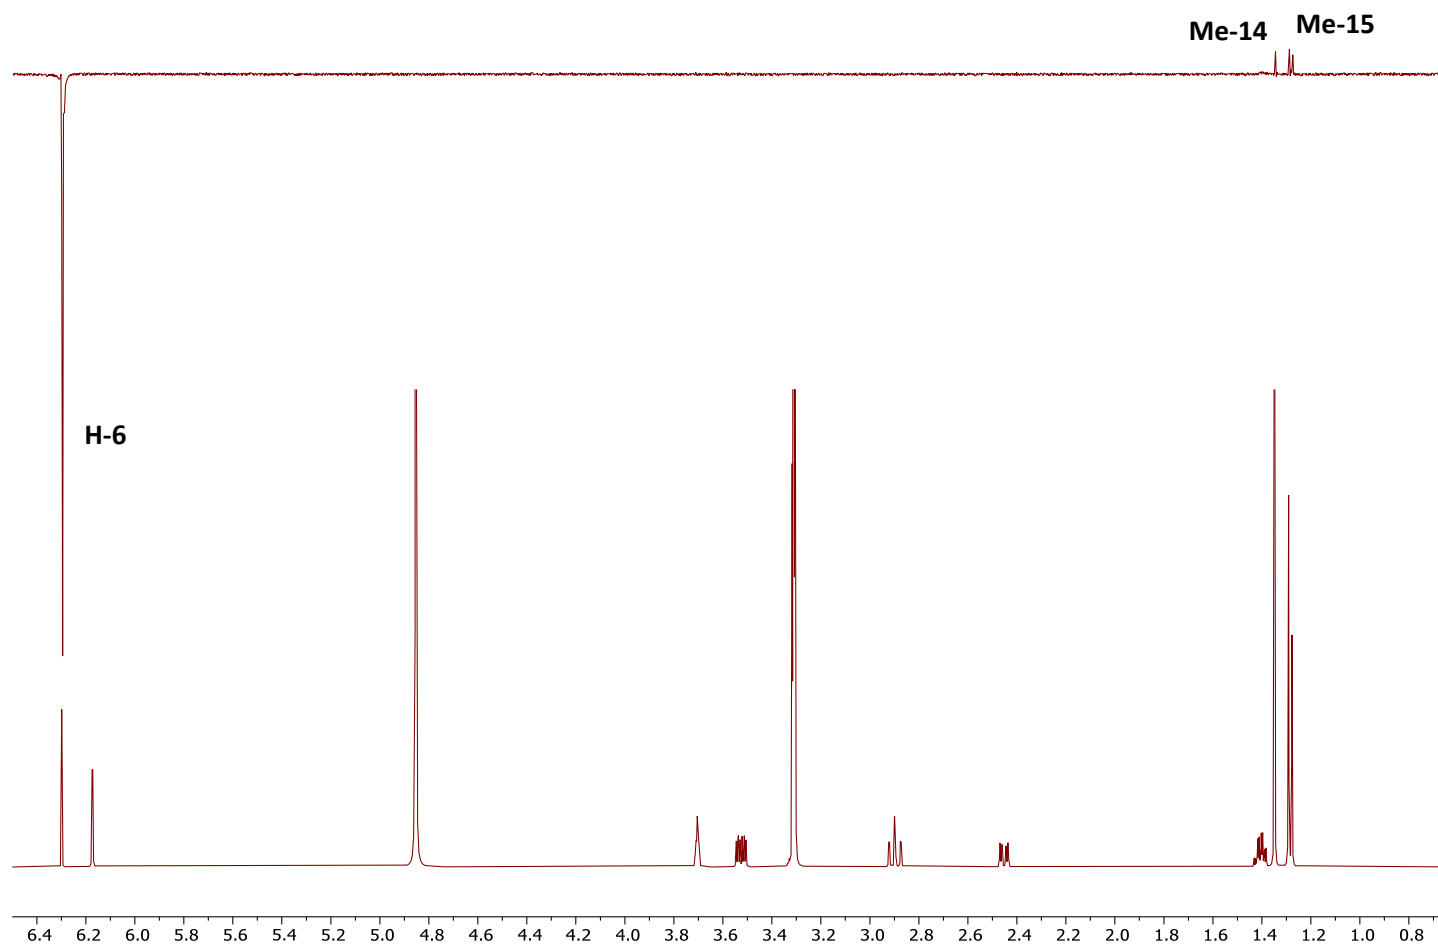

**Figure S6a.** 1D NOESY spectrum of compound **1**.



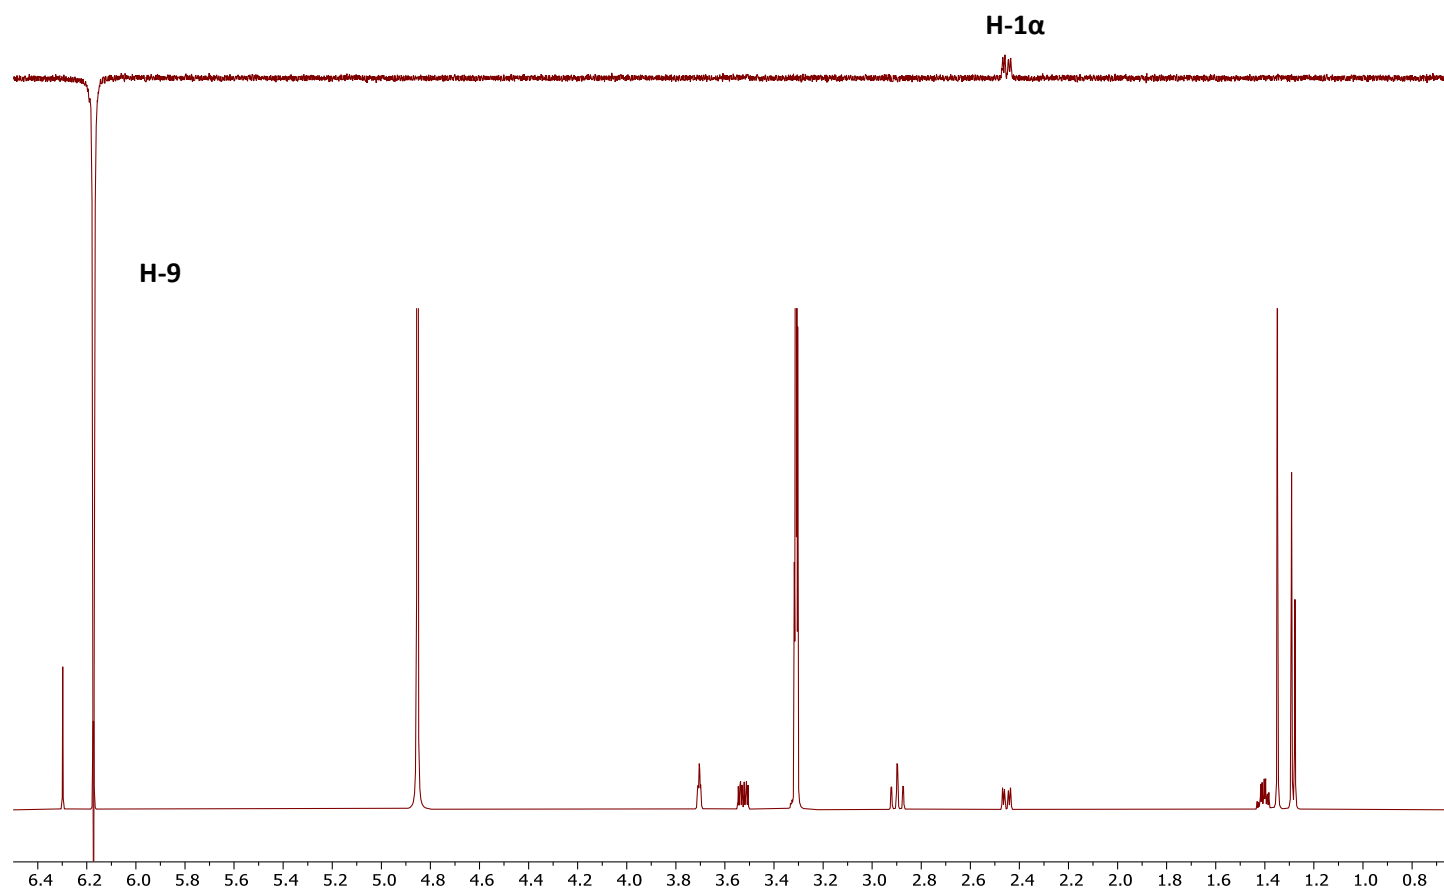

**Figure S6b.** 1D NOESY spectrum of compound **1**.

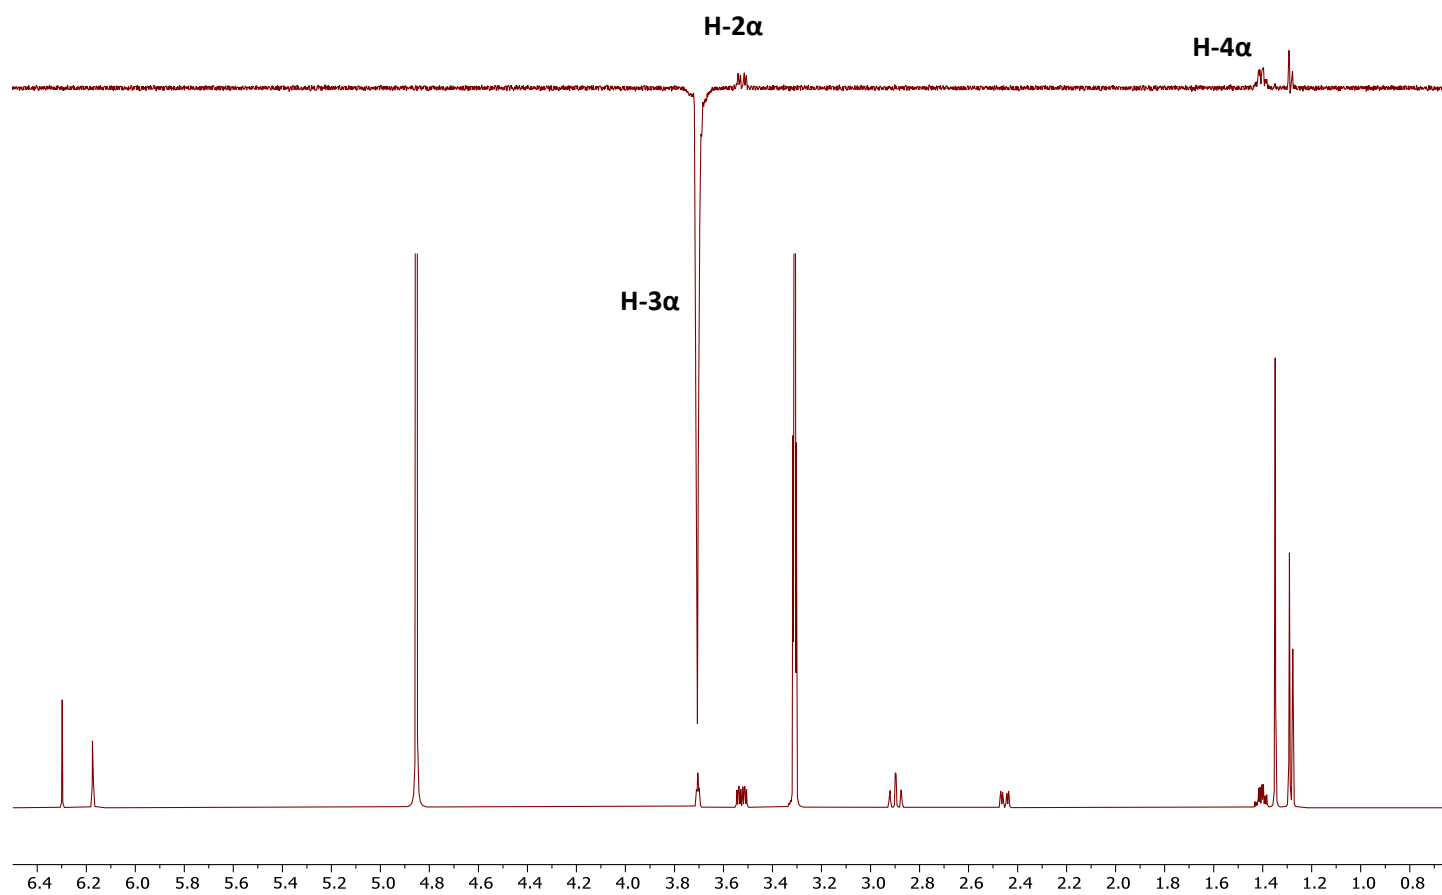

**Figure S6c.** 1D NOESY spectrum of compound **1**.

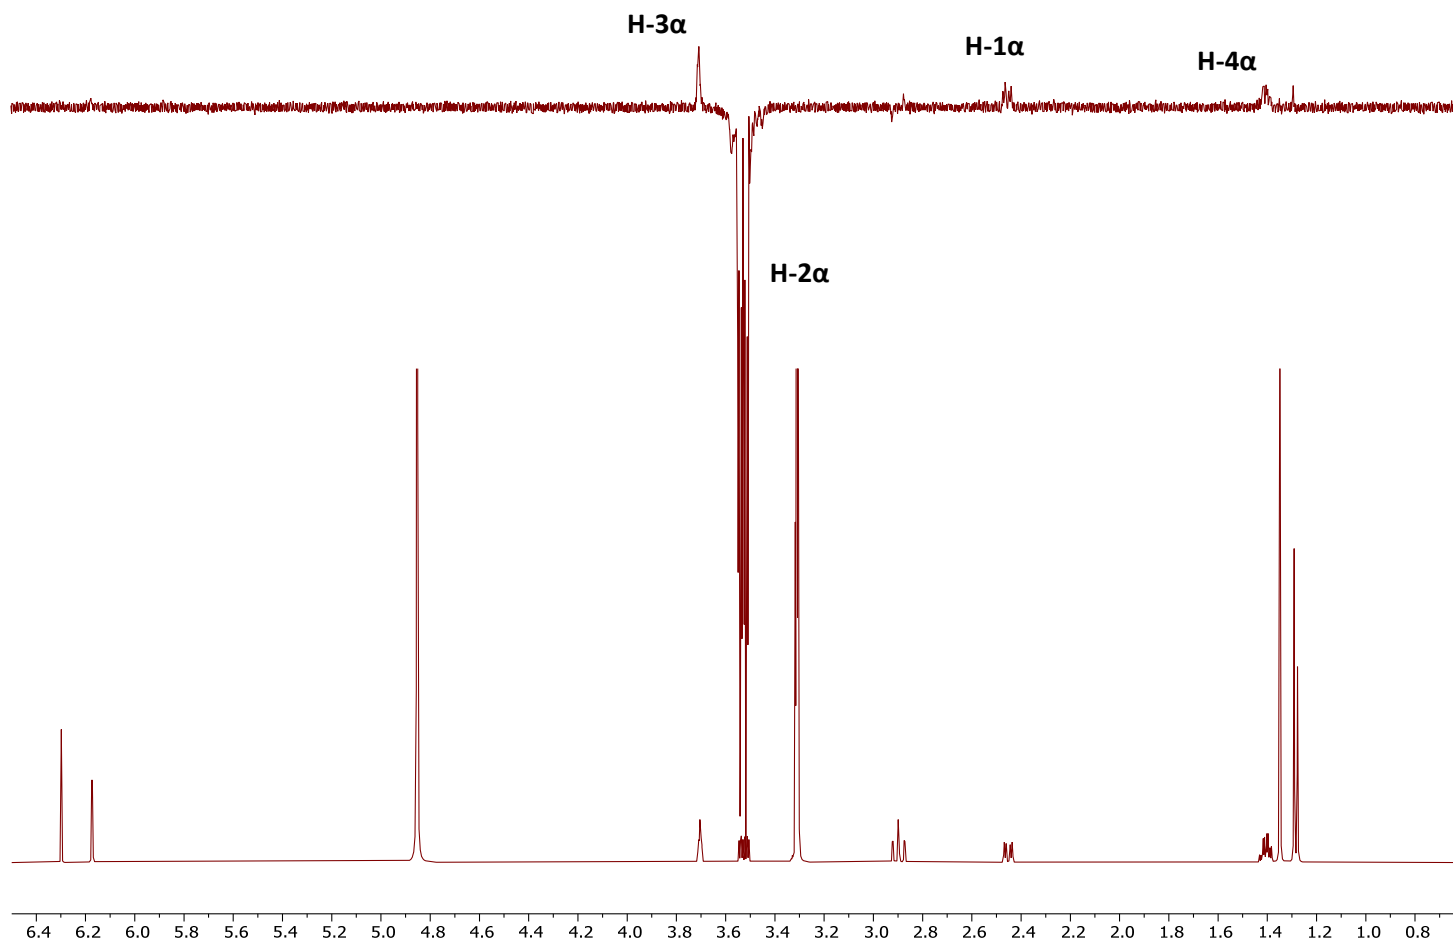

**Figure S6d.** 1D NOESY spectrum of compound 1.

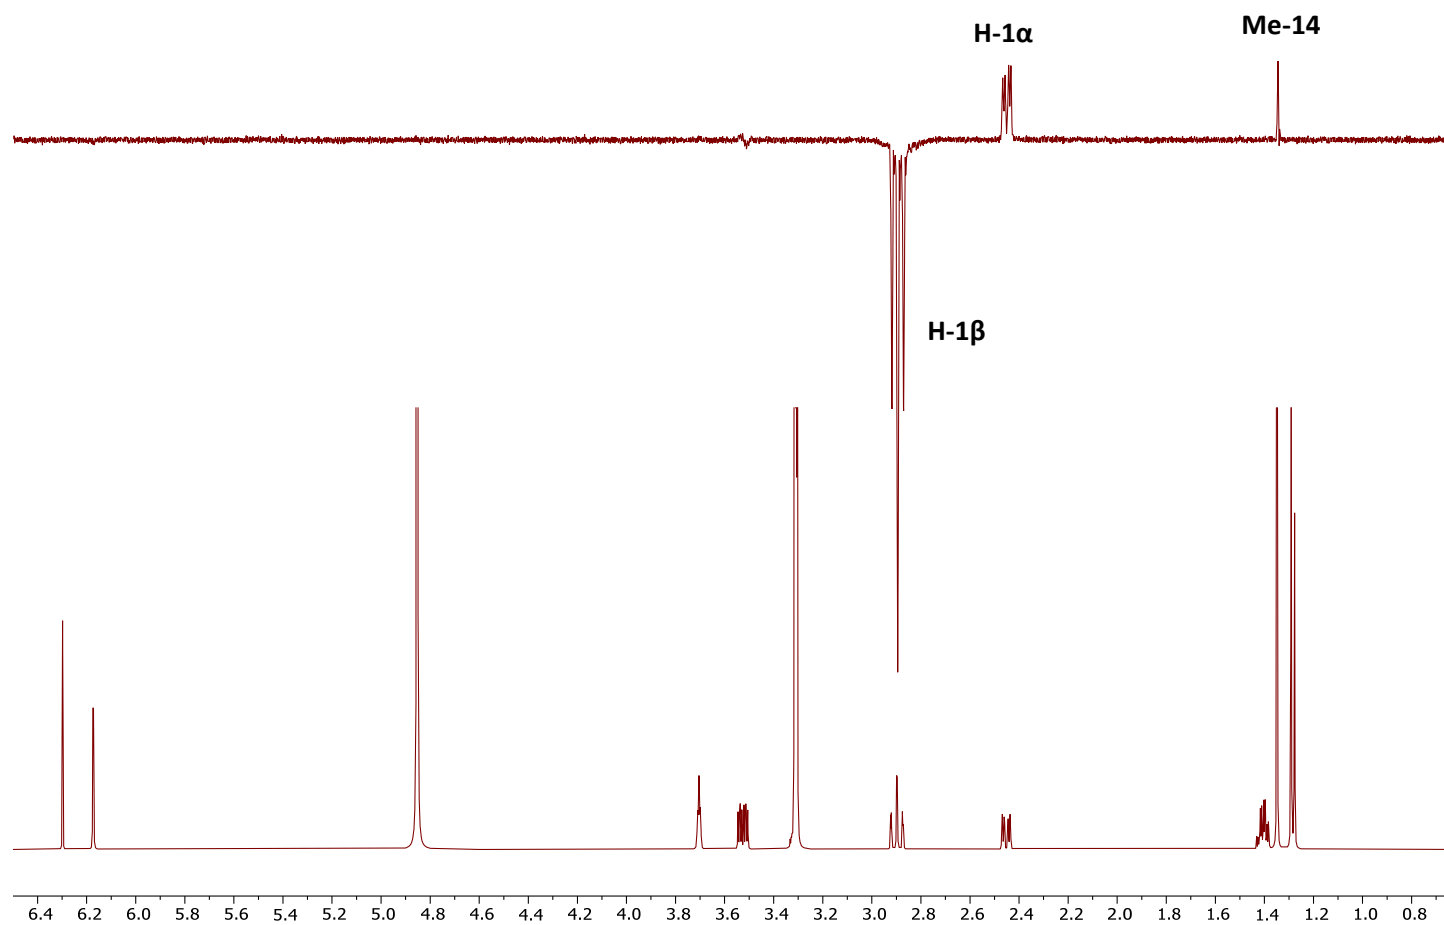

**Figure S6e.** 1D NOESY spectrum of compound **1**.

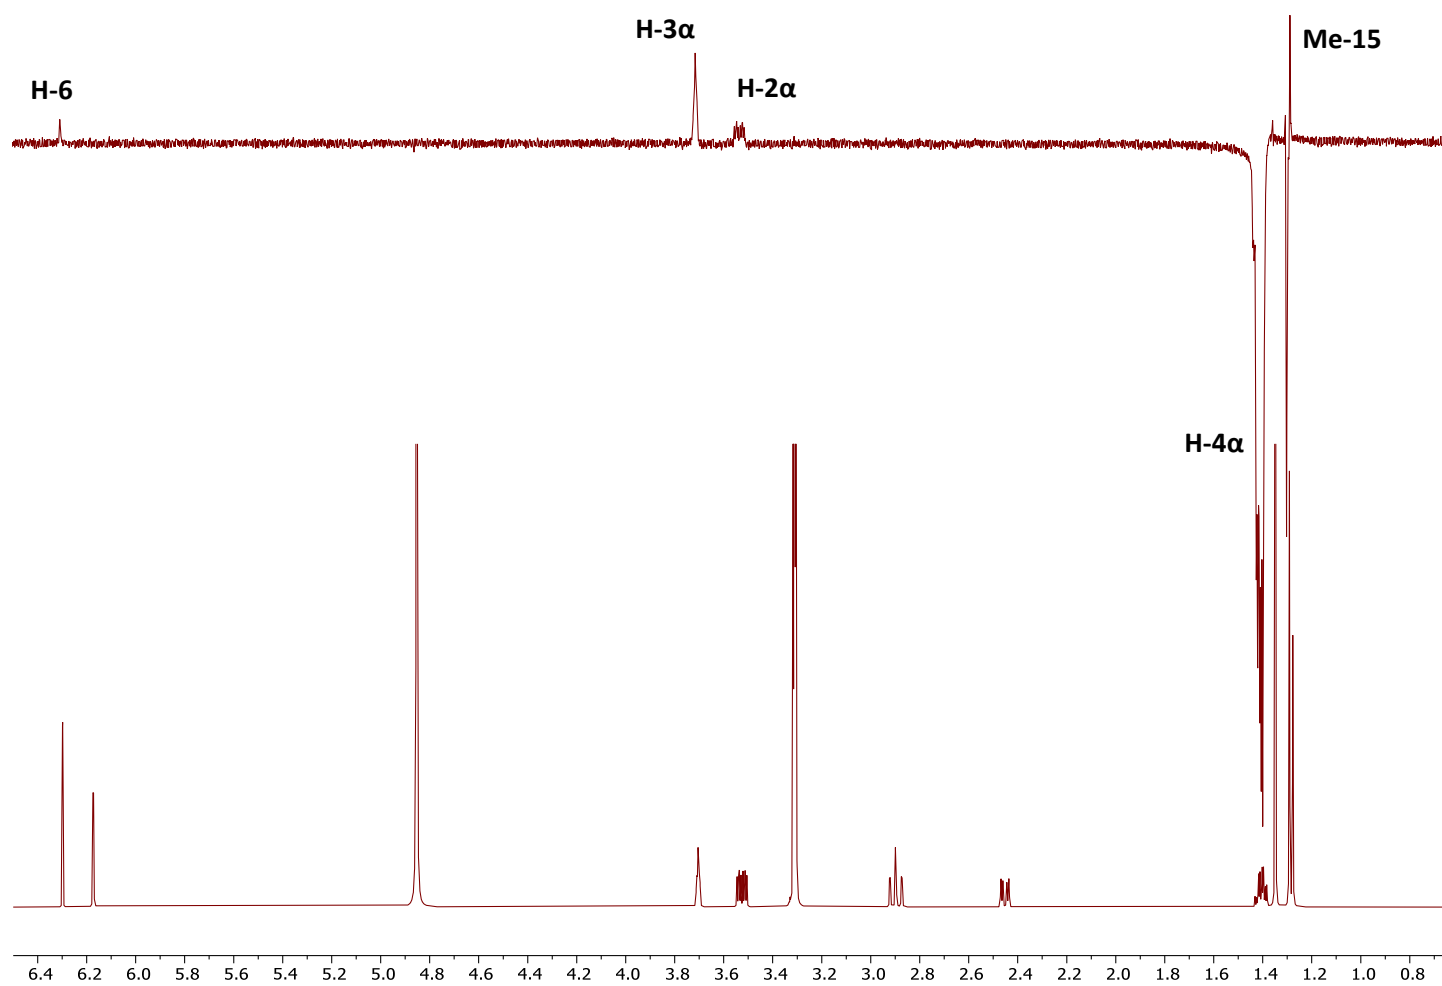

**Figure S6f.** 1D NOESY spectrum of compound **1**.

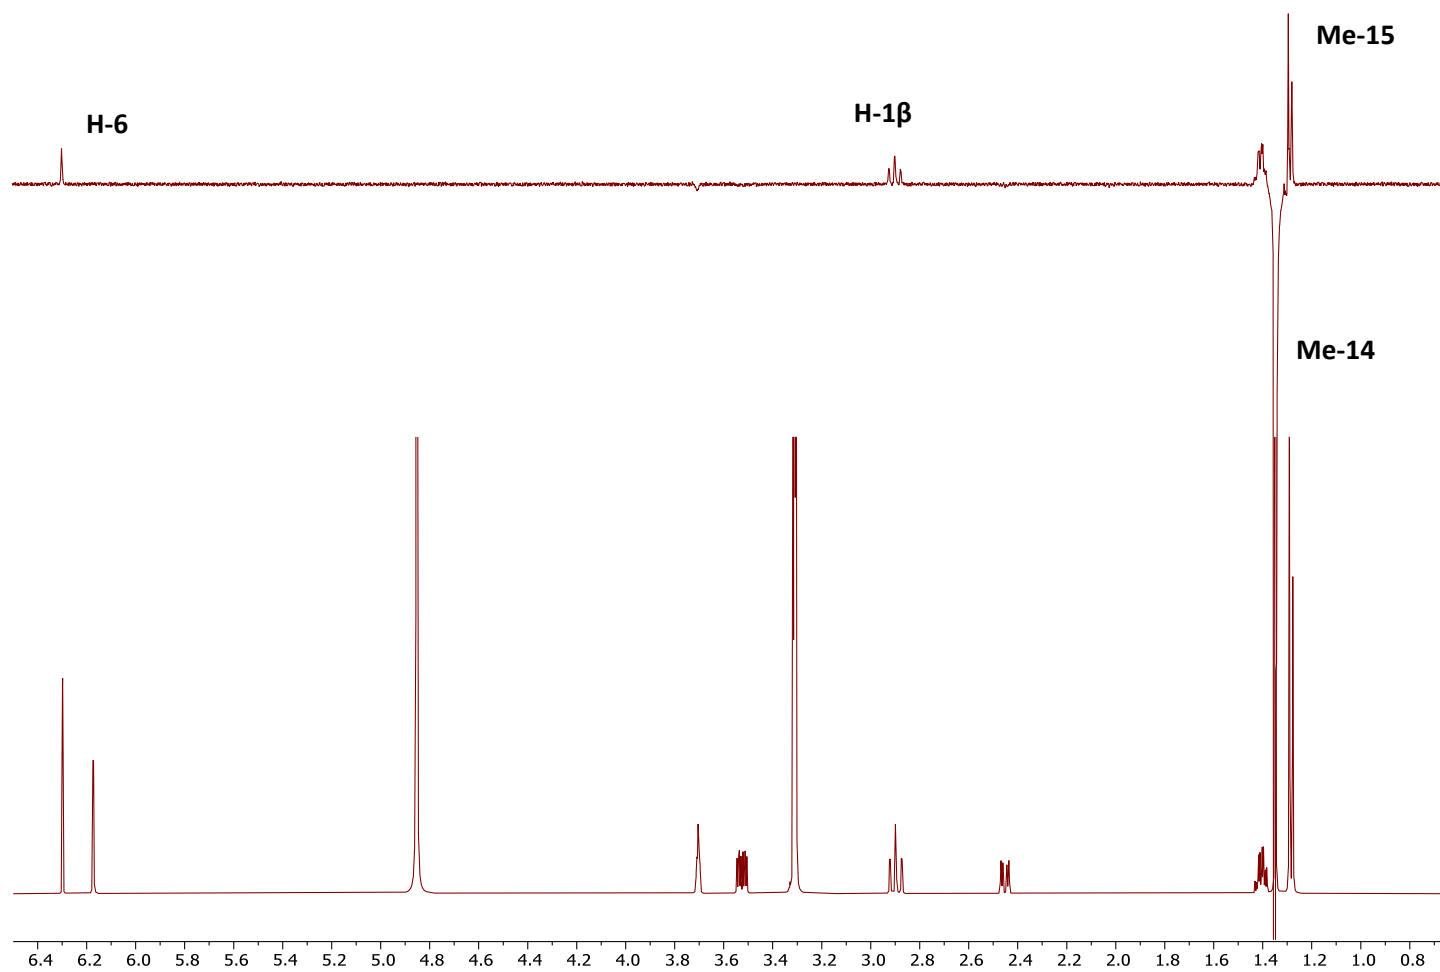

**Figure S6g.** 1D NOESY difference spectrum of compound **1**.

### Single Mass Analysis

Tolerance = 5.0 mDa / DBE: min = -1.5, max = 50.0

Element prediction: Off

Number of isotope peaks used for i-FIT = 3

Monoisotopic Mass, Even Electron Ions

76 formula(e) evaluated with 2 results within limits (up to 50 best isotopic matches for each mass)

Elements Used:

C: 0-500 H: 0-1000 O: 0-200 Na: 0-1

CDI-80-P8 26 (0.489)

1: TOF MS ES+

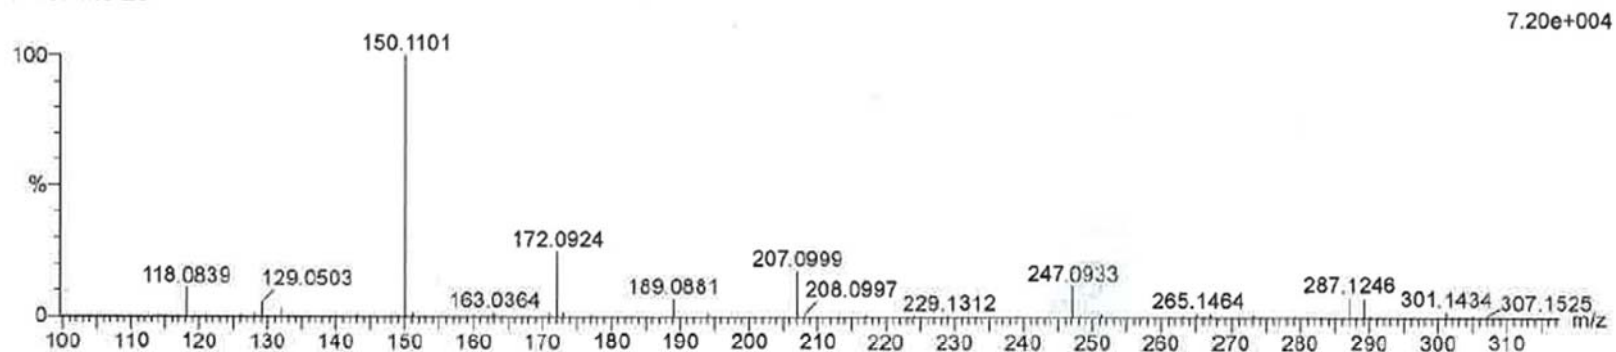

Minimum: -1.5  
Maximum: 5.0 10.0 50.0

| Mass     | Calc. Mass | mDa  | PPM   | DBE | i-FIT | Norm  | Conf(%) | Formula       |
|----------|------------|------|-------|-----|-------|-------|---------|---------------|
| 247.0933 | 247.0946   | -1.3 | -5.3  | 4.5 | 323.1 | 0.316 | 72.93   | C12 H16 O4 Na |
|          | 247.0970   | -3.7 | -15.0 | 7.5 | 324.1 | 1.307 | 27.07   | C14 H15 O4    |

Figure S7. HRESIMS spectrum of compound 1.

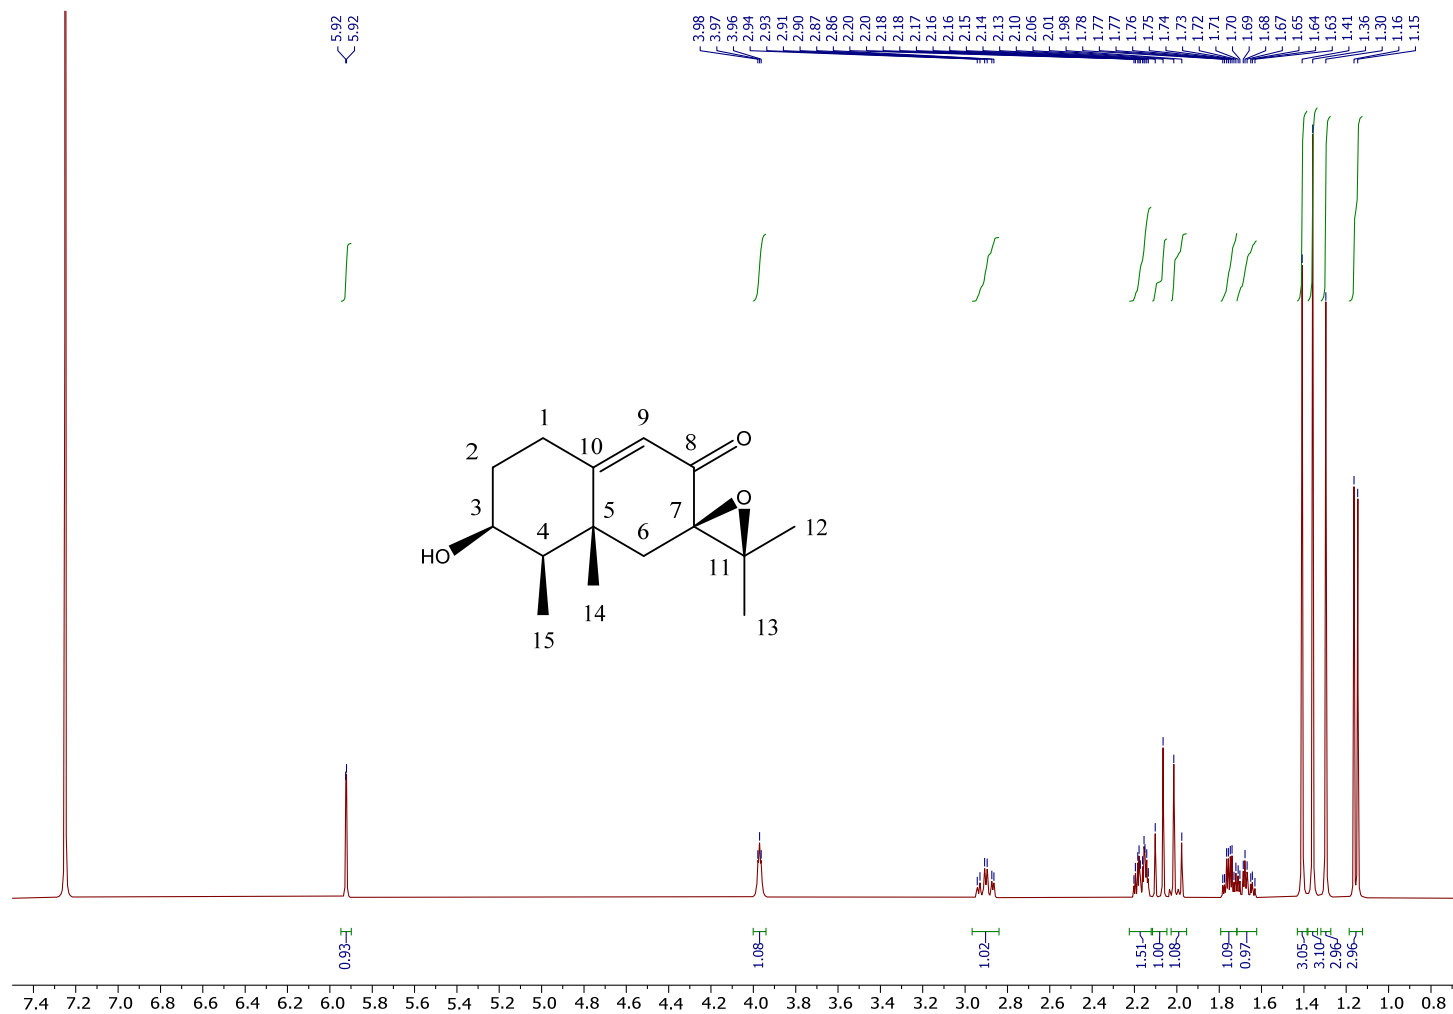

**Figure S8.** <sup>1</sup>H NMR spectrum (400 MHz, CDCl<sub>3</sub>) of compound 2.



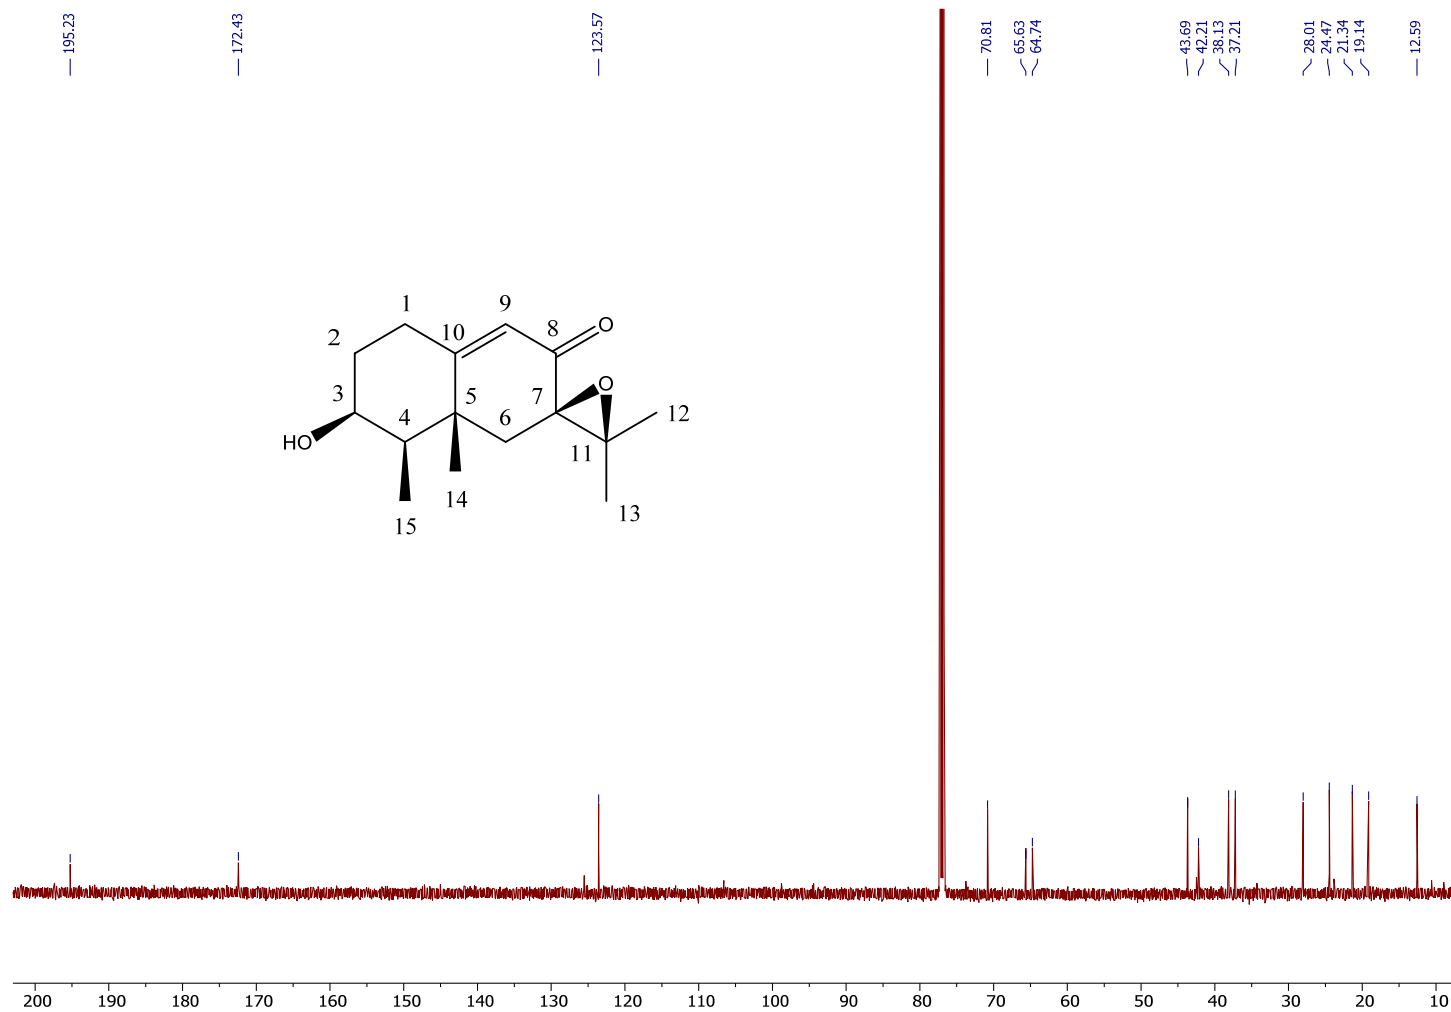

**Figure S9.** <sup>13</sup>C NMR spectrum (125 MHz, CDCl<sub>3</sub>) of compound 2.

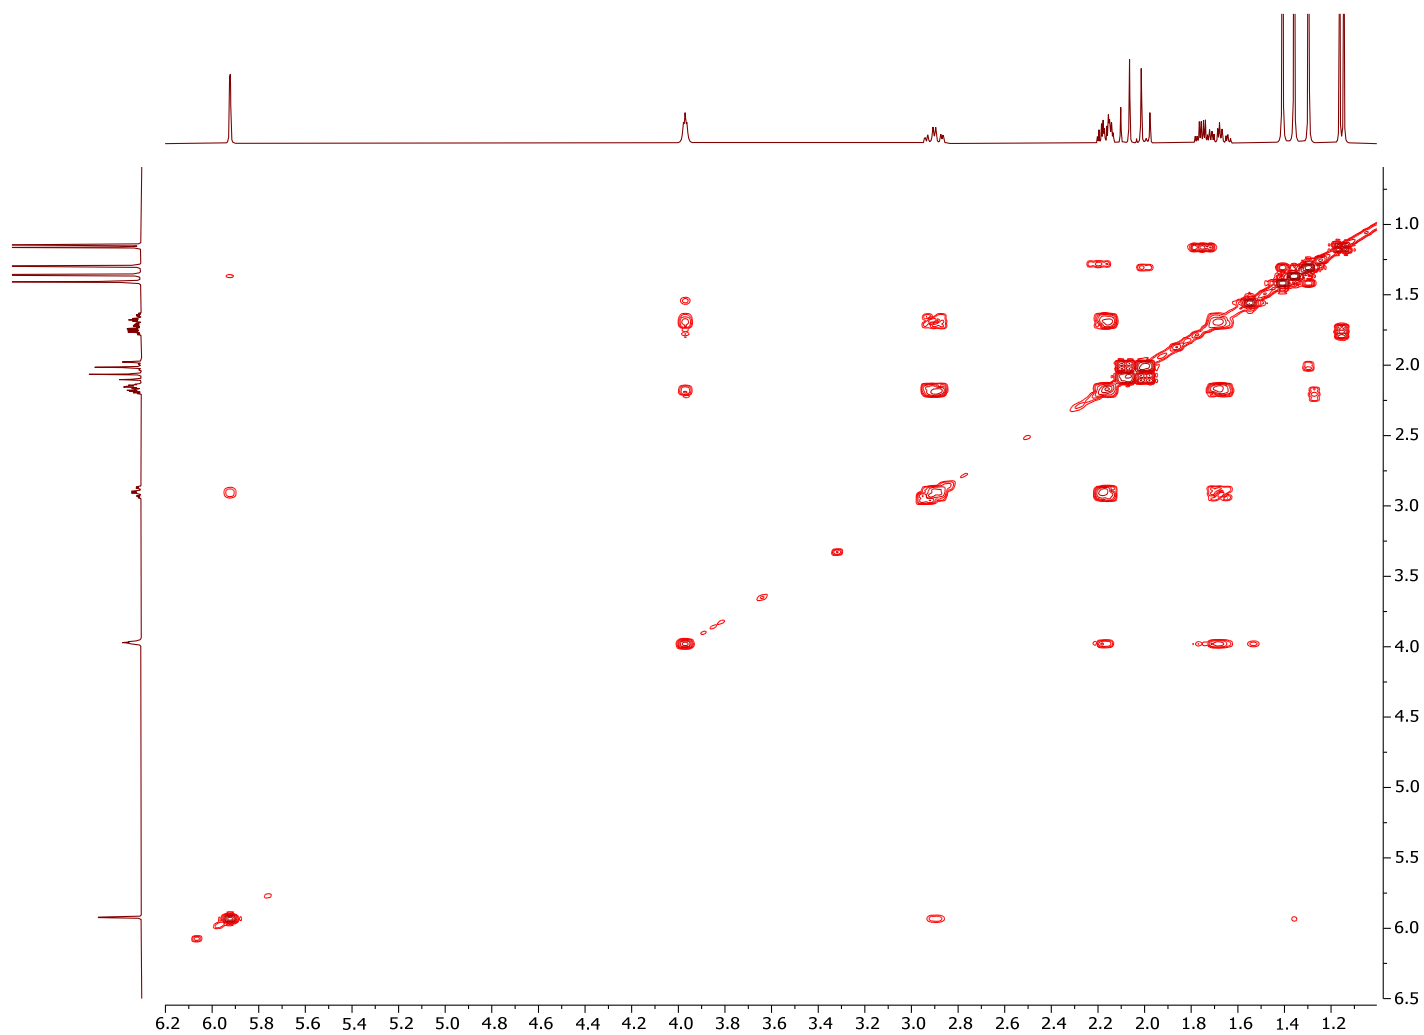

**Figure S10.** gCOSY spectrum of compound **2**.

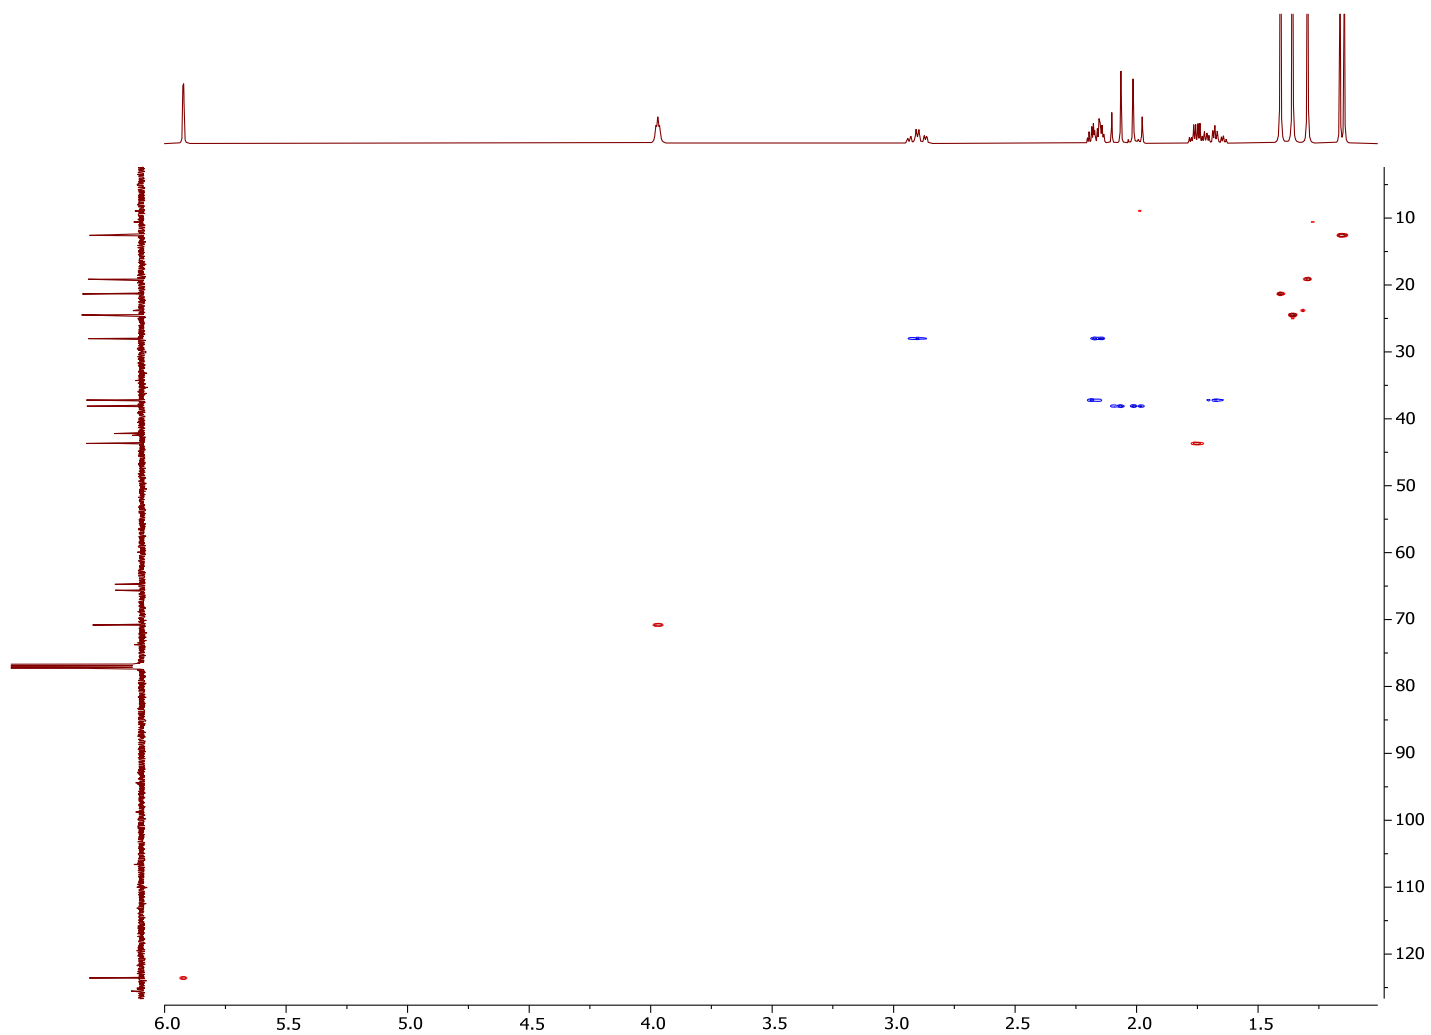

**Figure S11.** gHSQC spectrum of compound **2**.

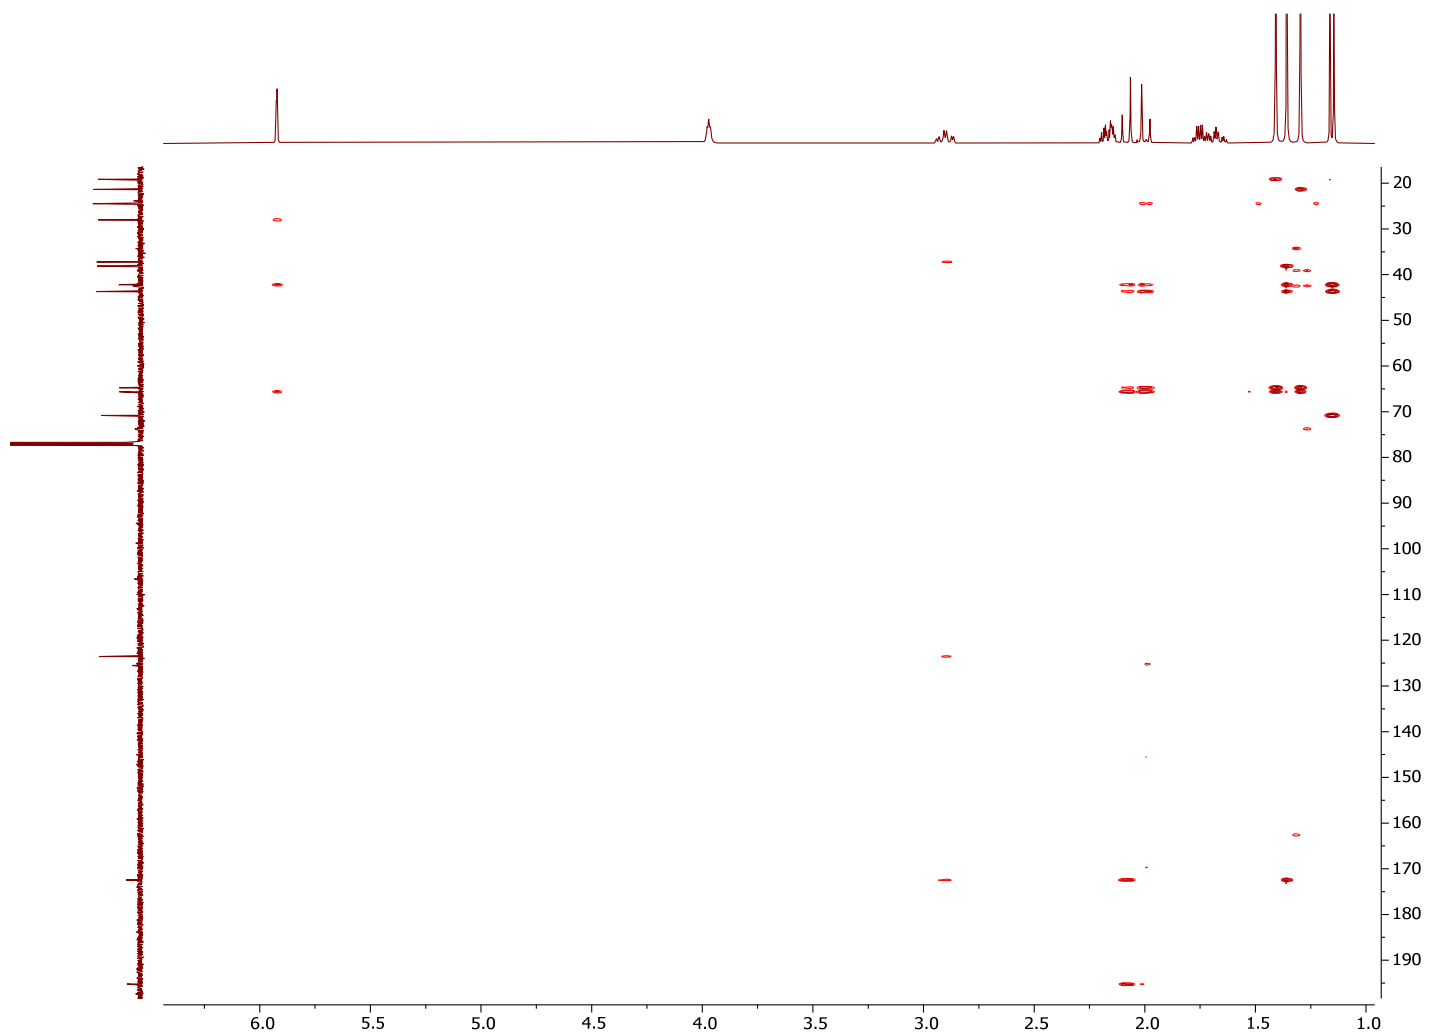

**Figure S12.** gHMBC spectrum of compound **2**.

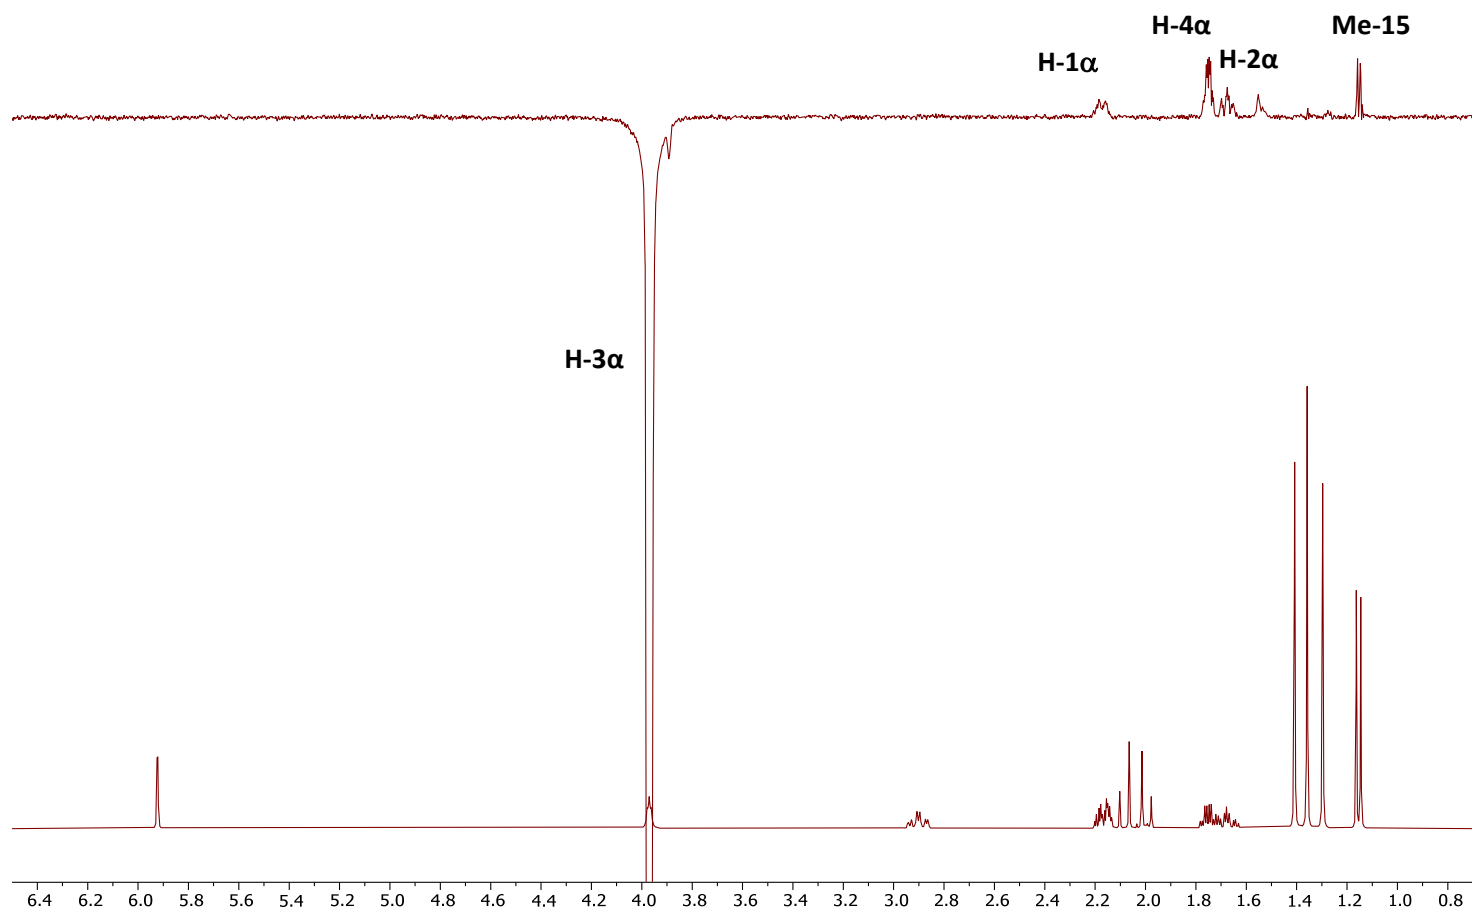

**Figure S13a.** 1D NOESY spectrum of compound **2**.

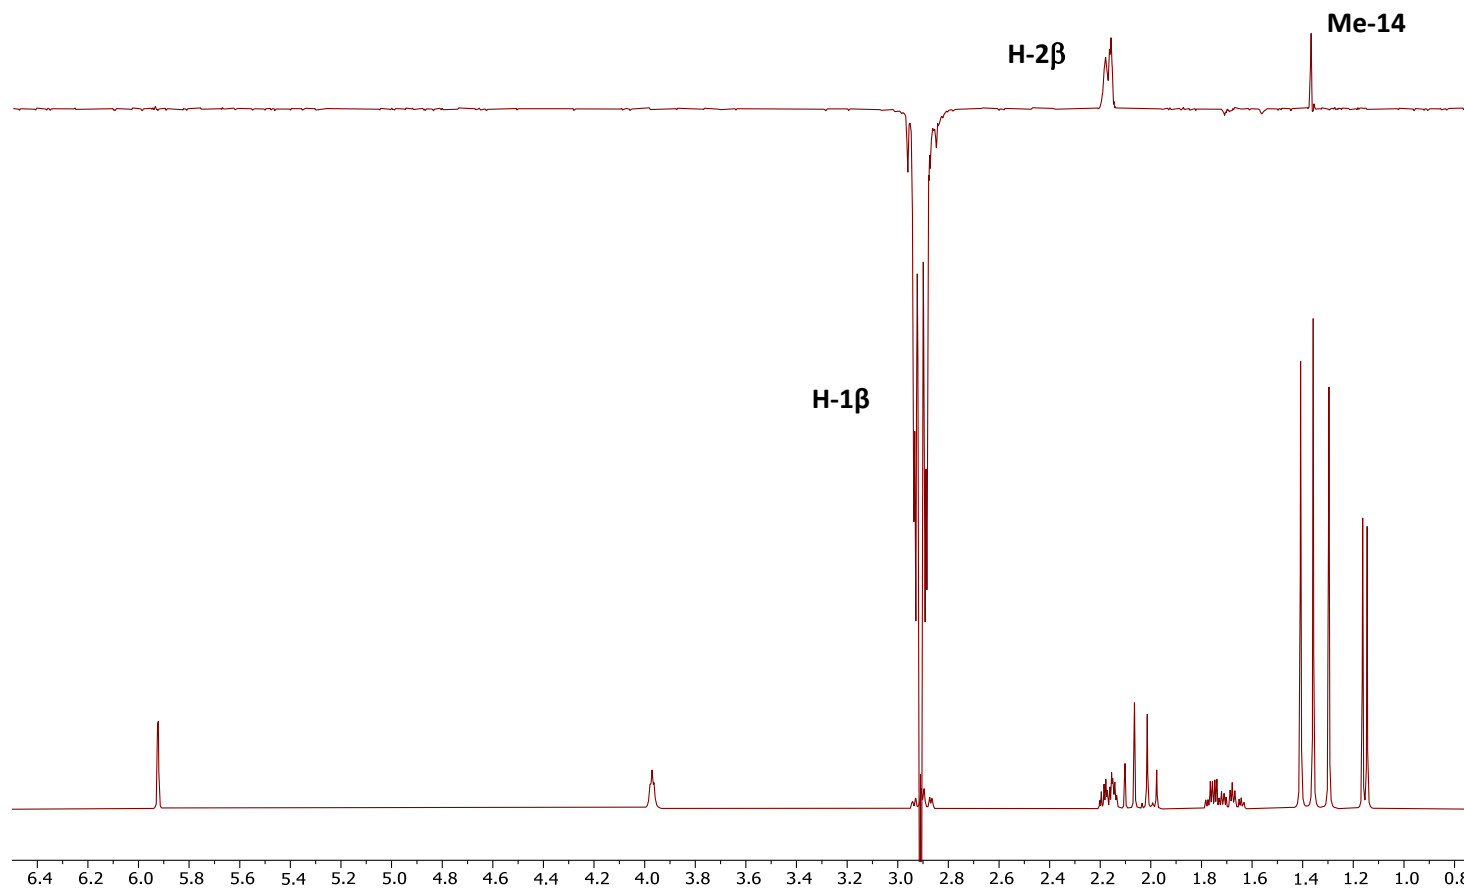

**Figure S13b.** 1D NOESY spectrum of compound **2**.

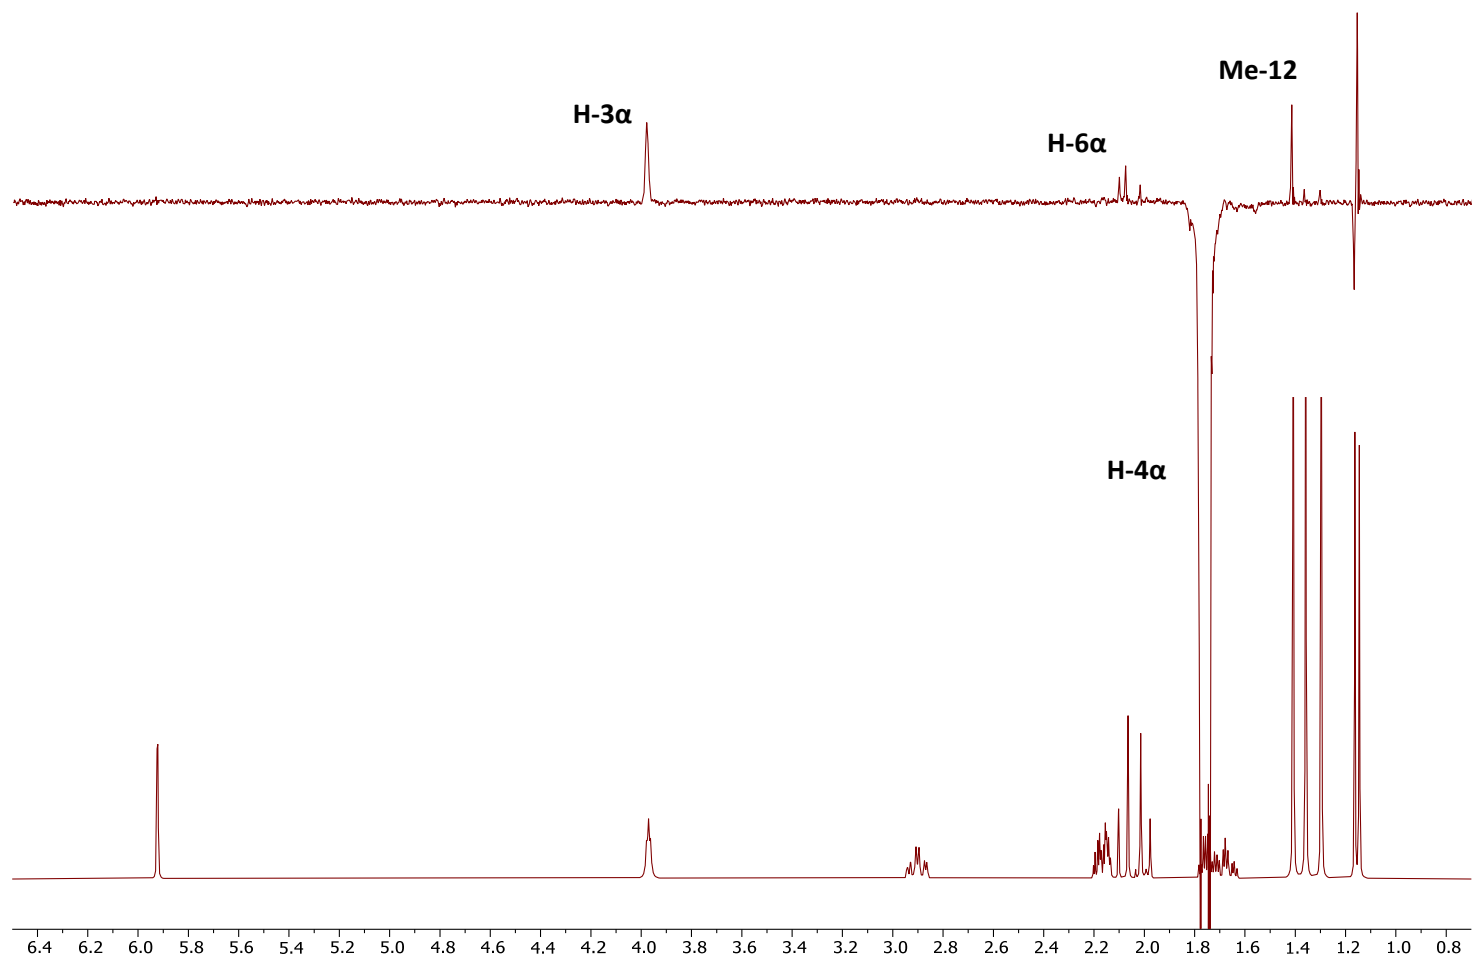

**Figure S13c.** 1D NOESY spectrum of compound **2**.

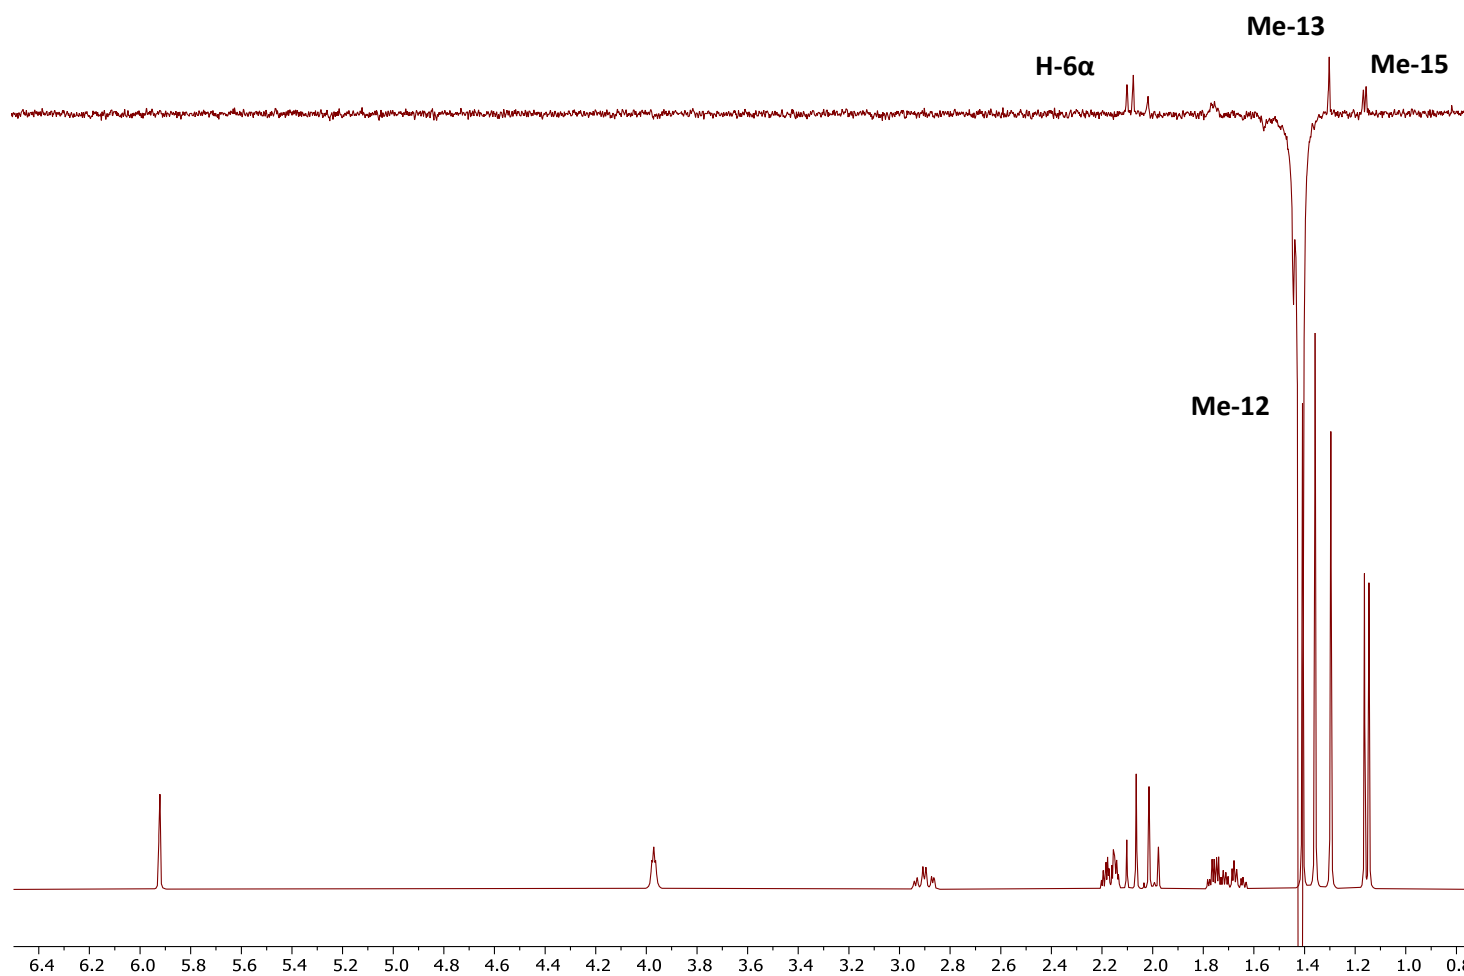

**Figure S13d.** 1D NOESY spectrum of compound **2**.



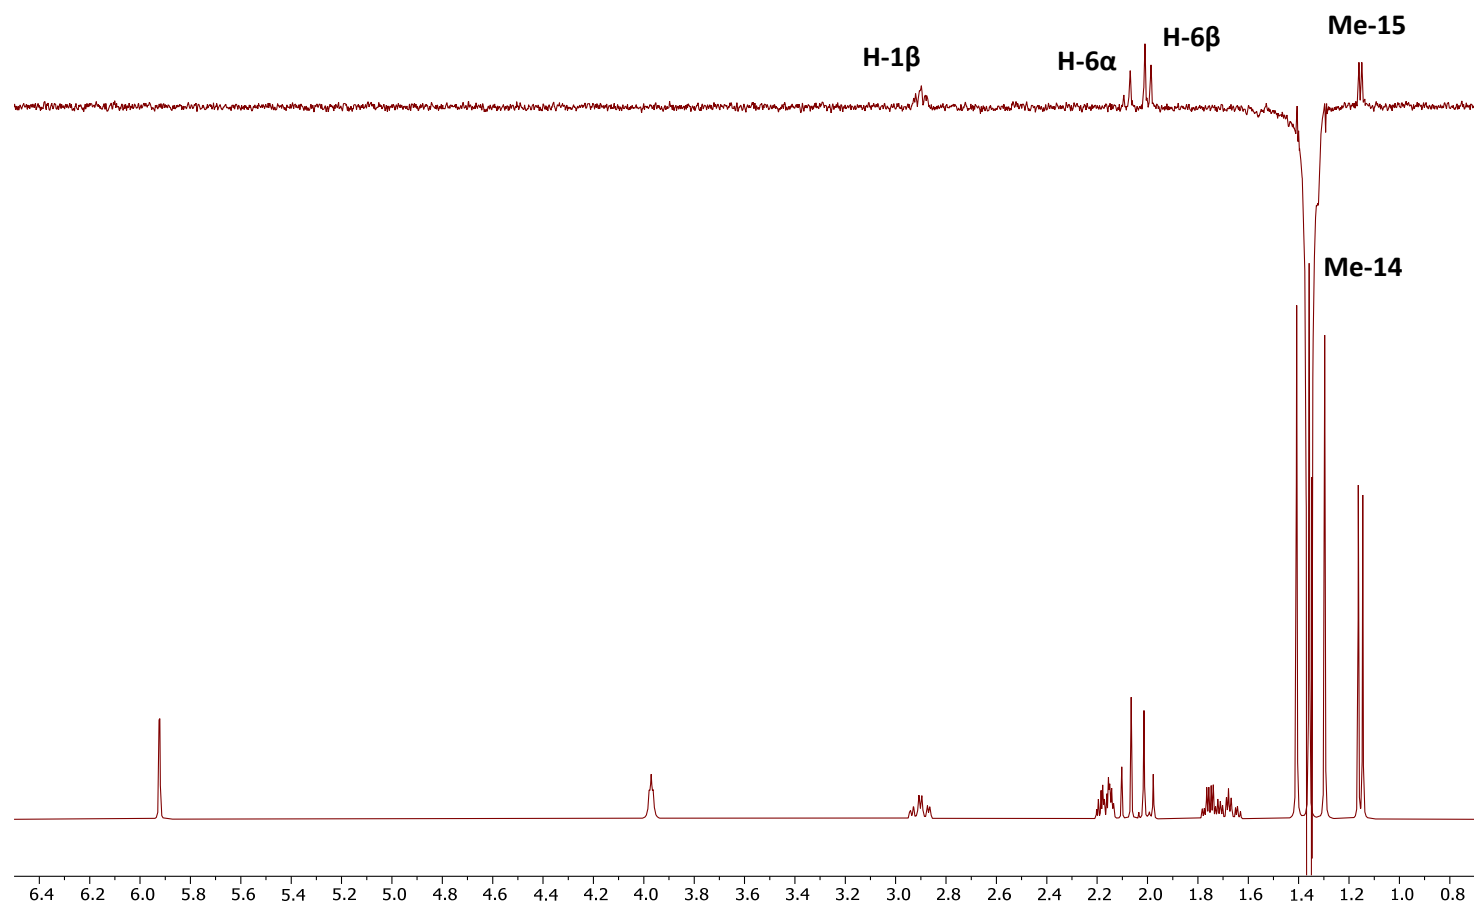

**Figure S13e.** 1D NOESY spectrum of compound **2**.

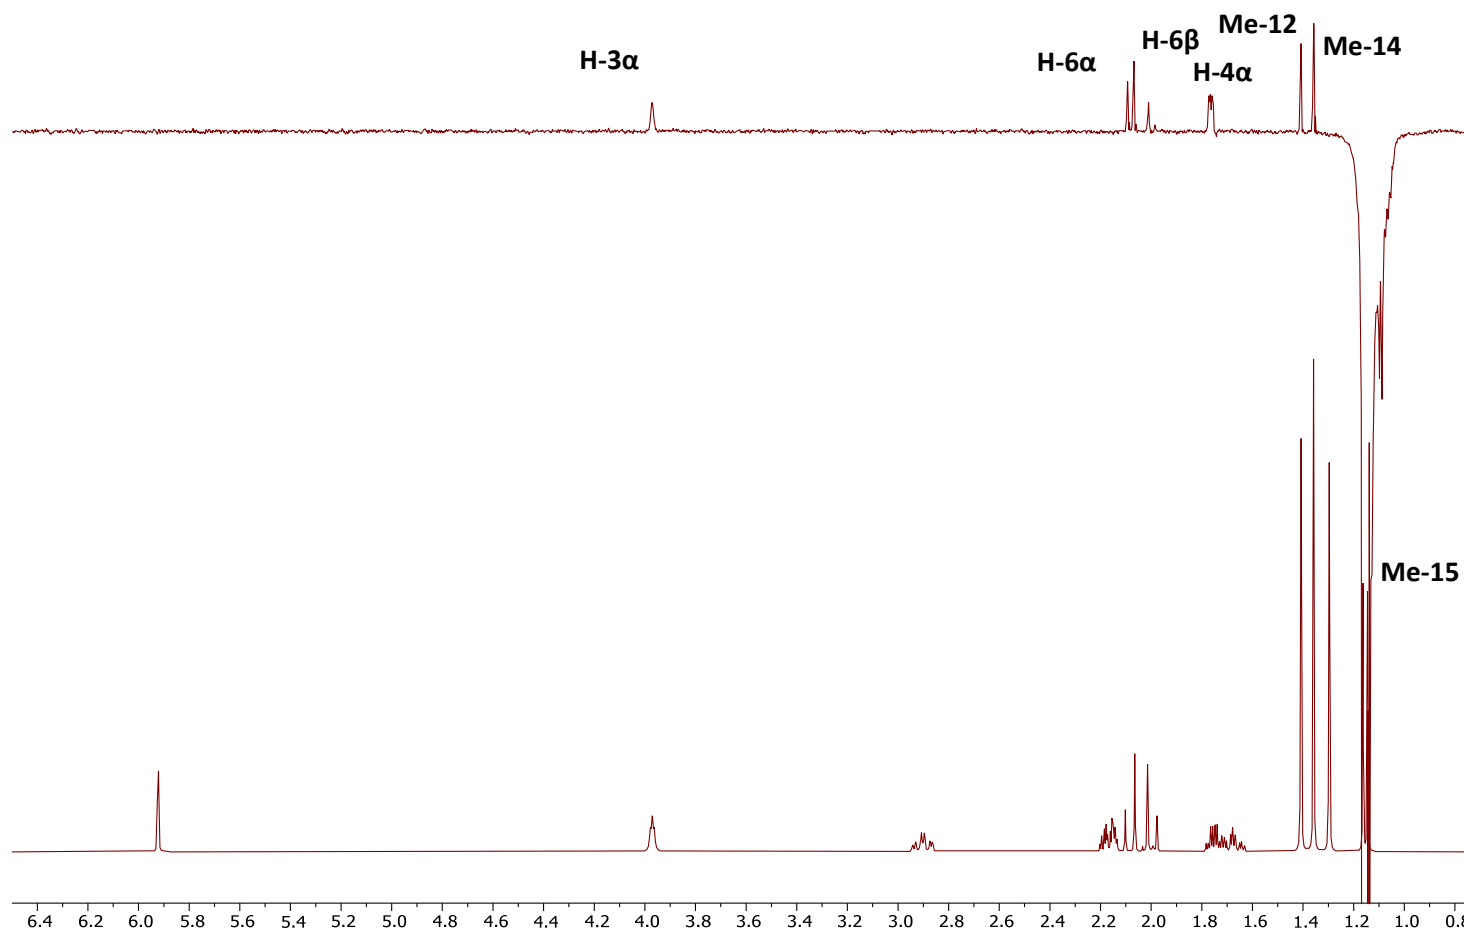

**Figure S13f.** 1D NOESY spectrum of compound **2**.

### Single Mass Analysis

Tolerance = 5.0 mDa / DBE: min = -1.5, max = 50.0

Element prediction: Off

Number of isotope peaks used for i-FIT = 3

Monoisotopic Mass, Even Electron Ions

83 formula(e) evaluated with 2 results within limits (up to 50 best isotopic matches for each mass)

Elements Used:

C: 0-500 H: 0-1000 O: 0-200 Na: 0-1

CD2-80-P6 43 (0.803)

1: TOF MS ES+

9.29e+006

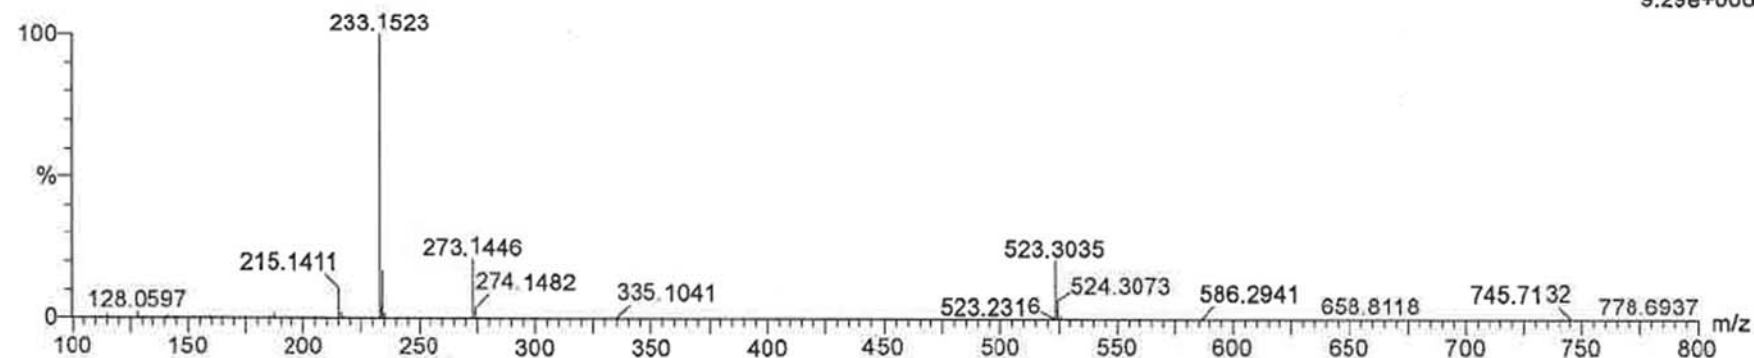

Minimum:

Maximum: 5.0 10.0 -1.5

| Mass     | Calc. Mass | mDa  | PPM   | DBE | i-FIT | Norm  | Conf (%) | Formula       |
|----------|------------|------|-------|-----|-------|-------|----------|---------------|
| 273.1446 | 273.1467   | -2.1 | -7.7  | 4.5 | 685.4 | 0.150 | 86.07    | C15 H22 O3 Na |
|          | 273.1491   | -4.5 | -16.5 | 7.5 | 687.2 | 1.971 | 13.93    | C17 H21 O3    |

Figure S14. HRESIMS spectrum of compound 2.

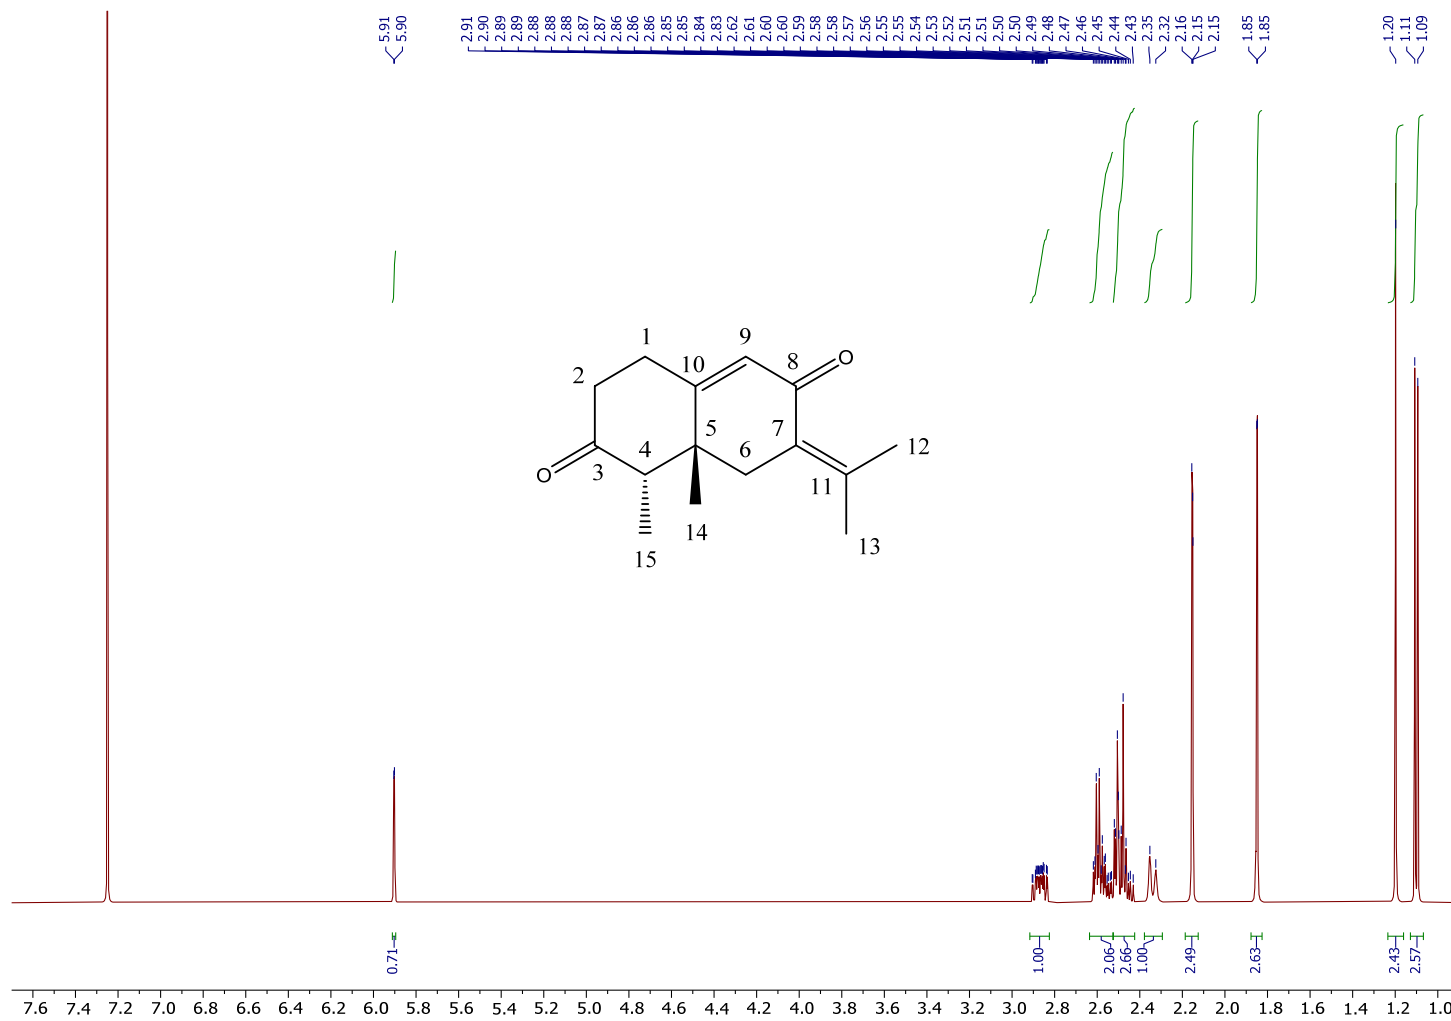

Figure S15. <sup>1</sup>H NMR spectrum (500 MHz, CDCl<sub>3</sub>) of compound 3.

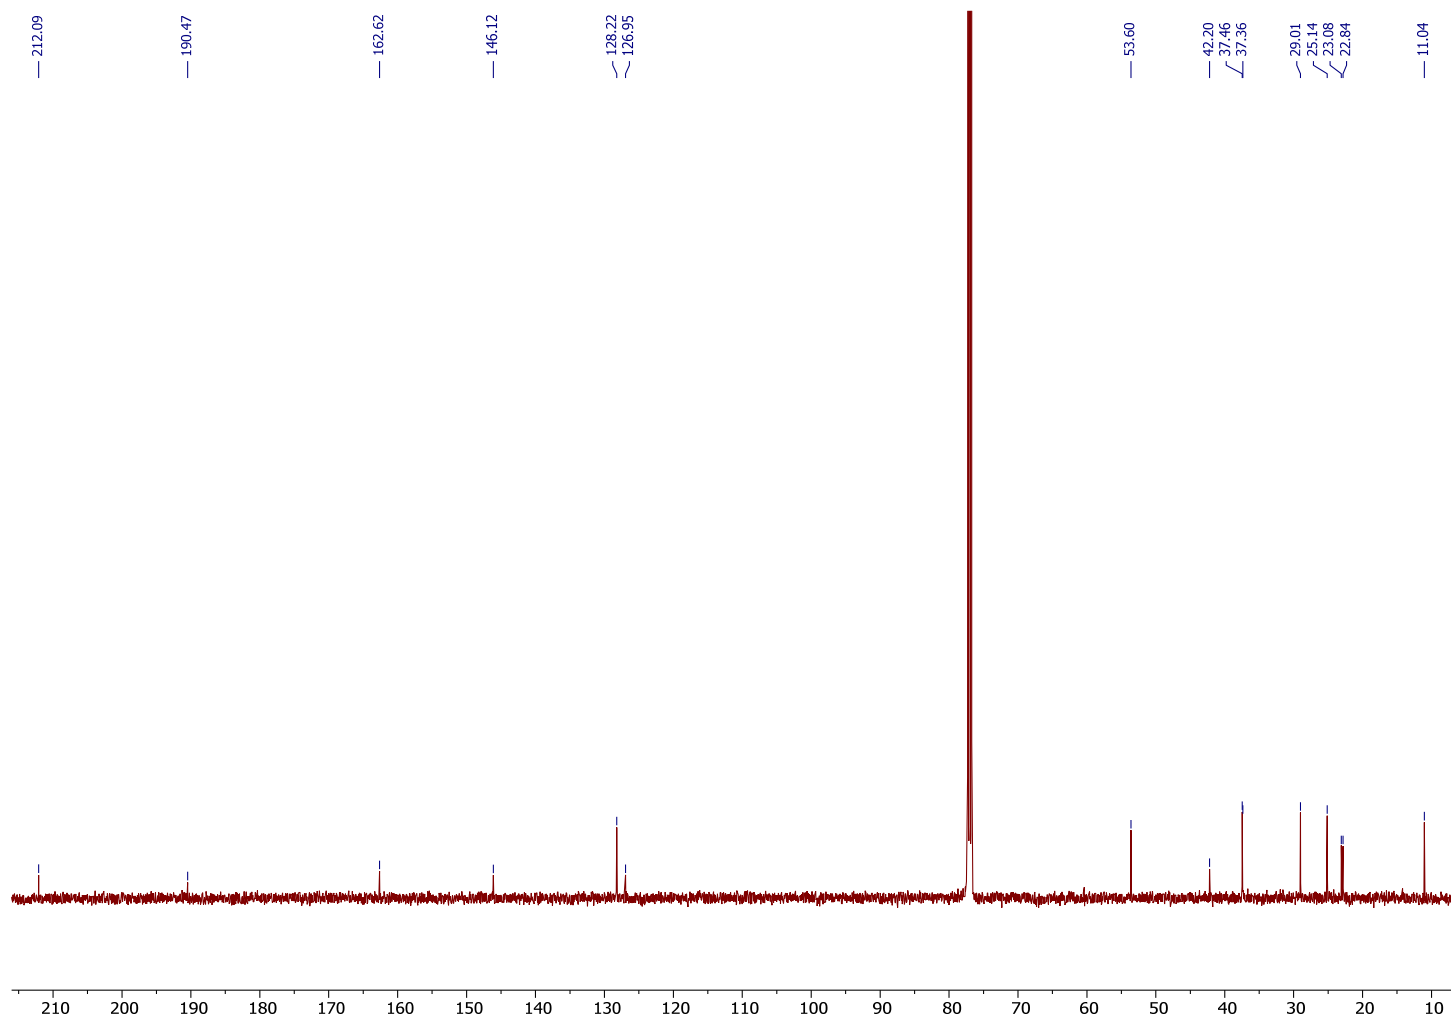

**Figure S16.**  $^{13}\text{C}$  NMR spectrum (125 MHz,  $\text{CDCl}_3$ ) of compound **3**.

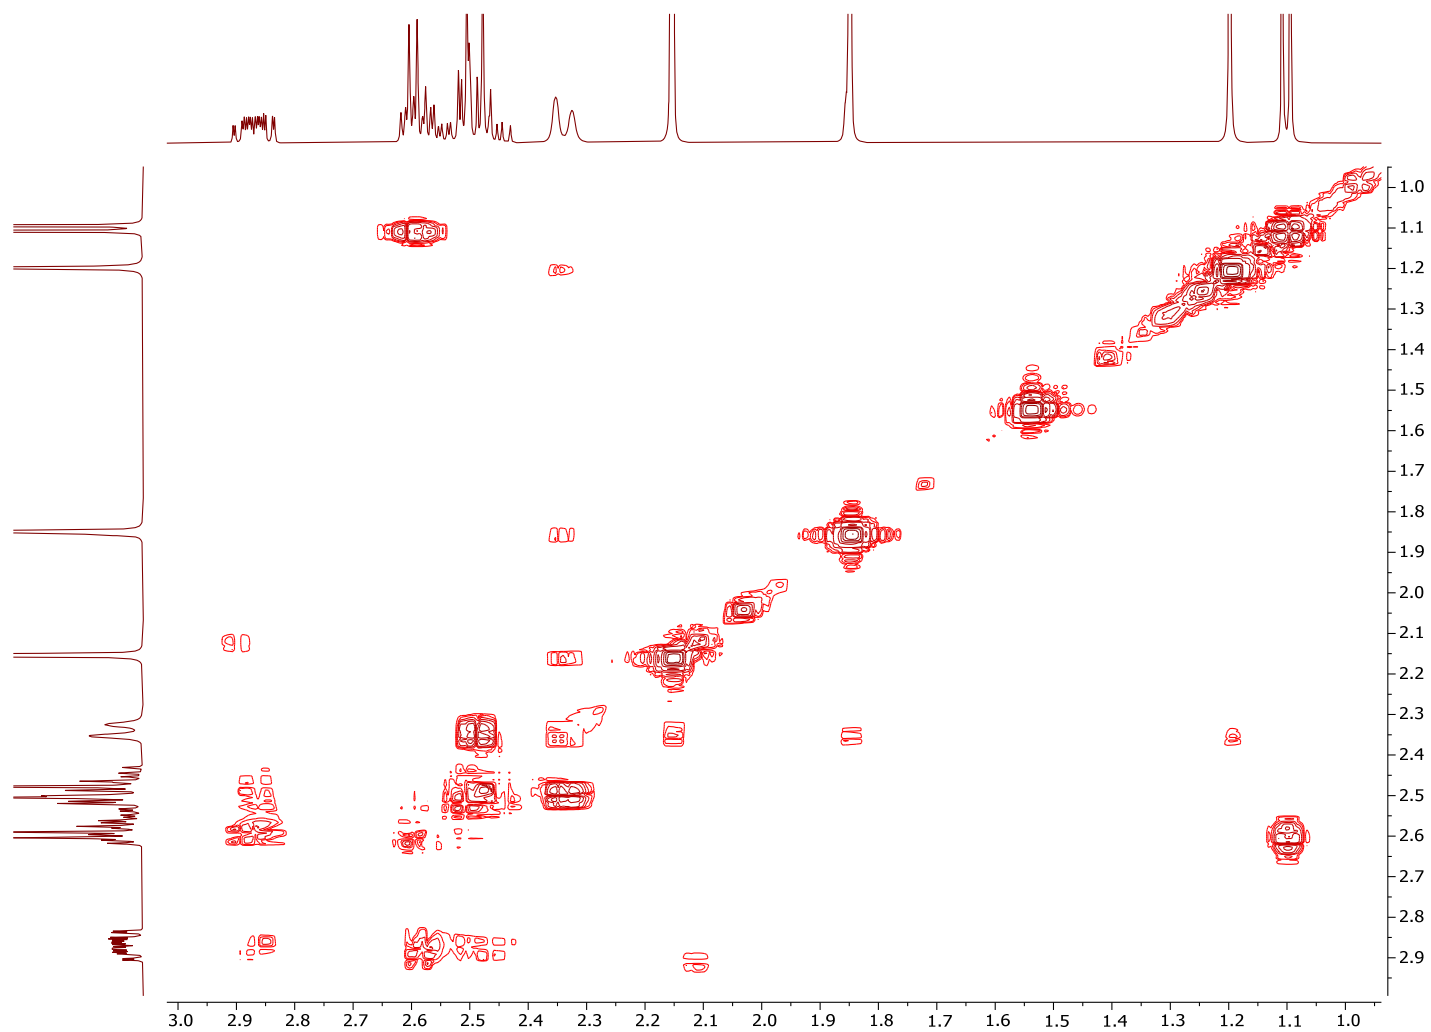

**Figure S17.** gCOSY spectrum of compound **3**.

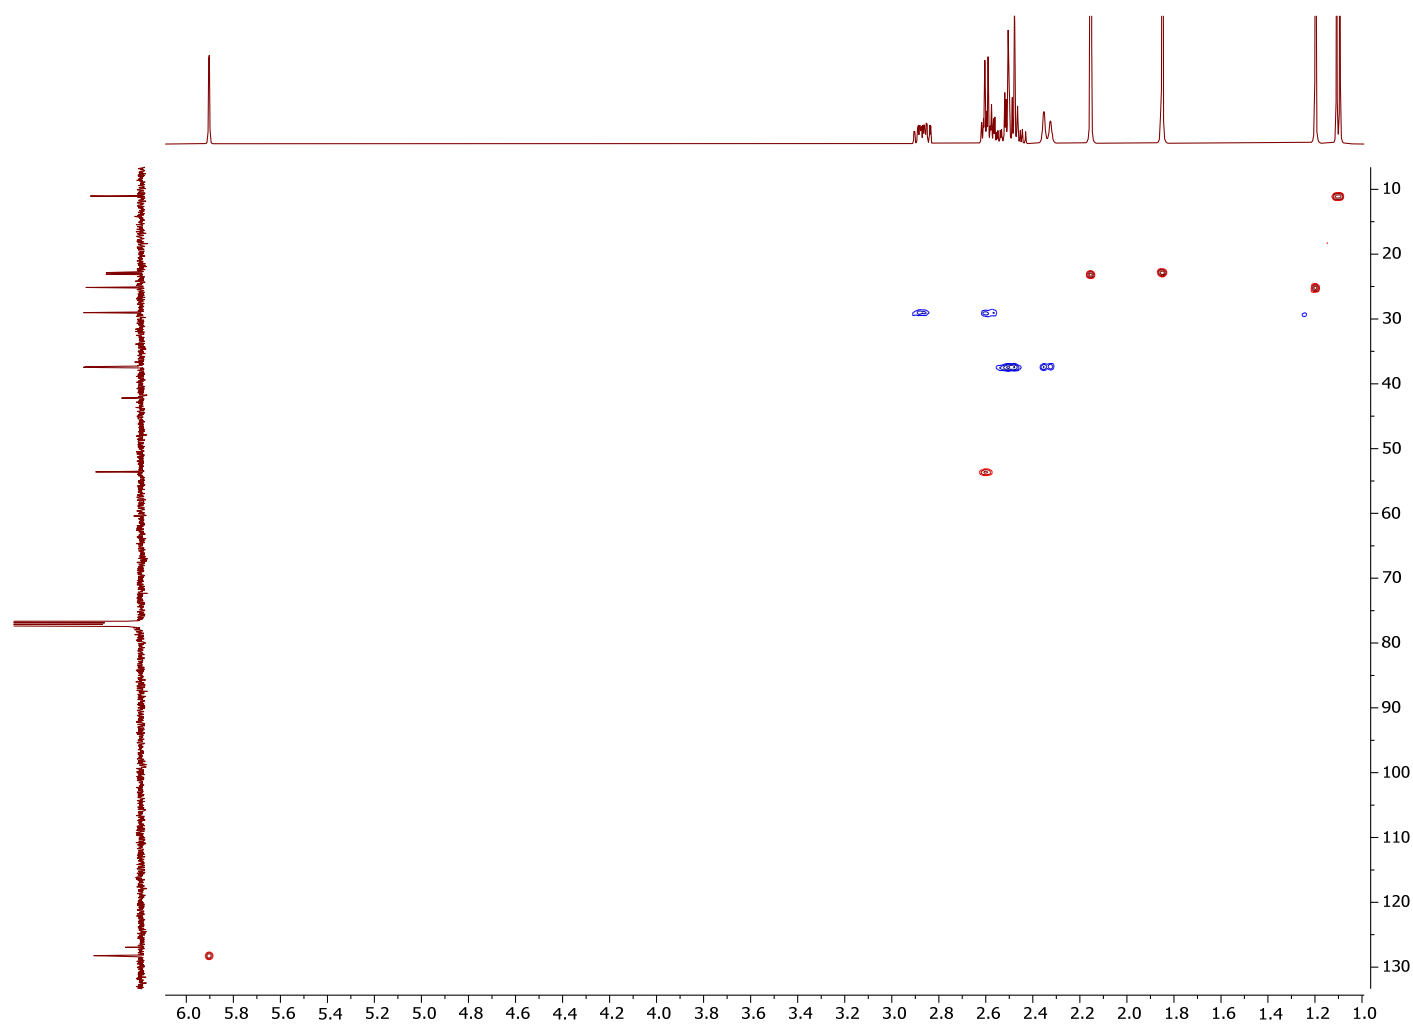

**Figure S18.** gHSQC spectrum of compound **3**.

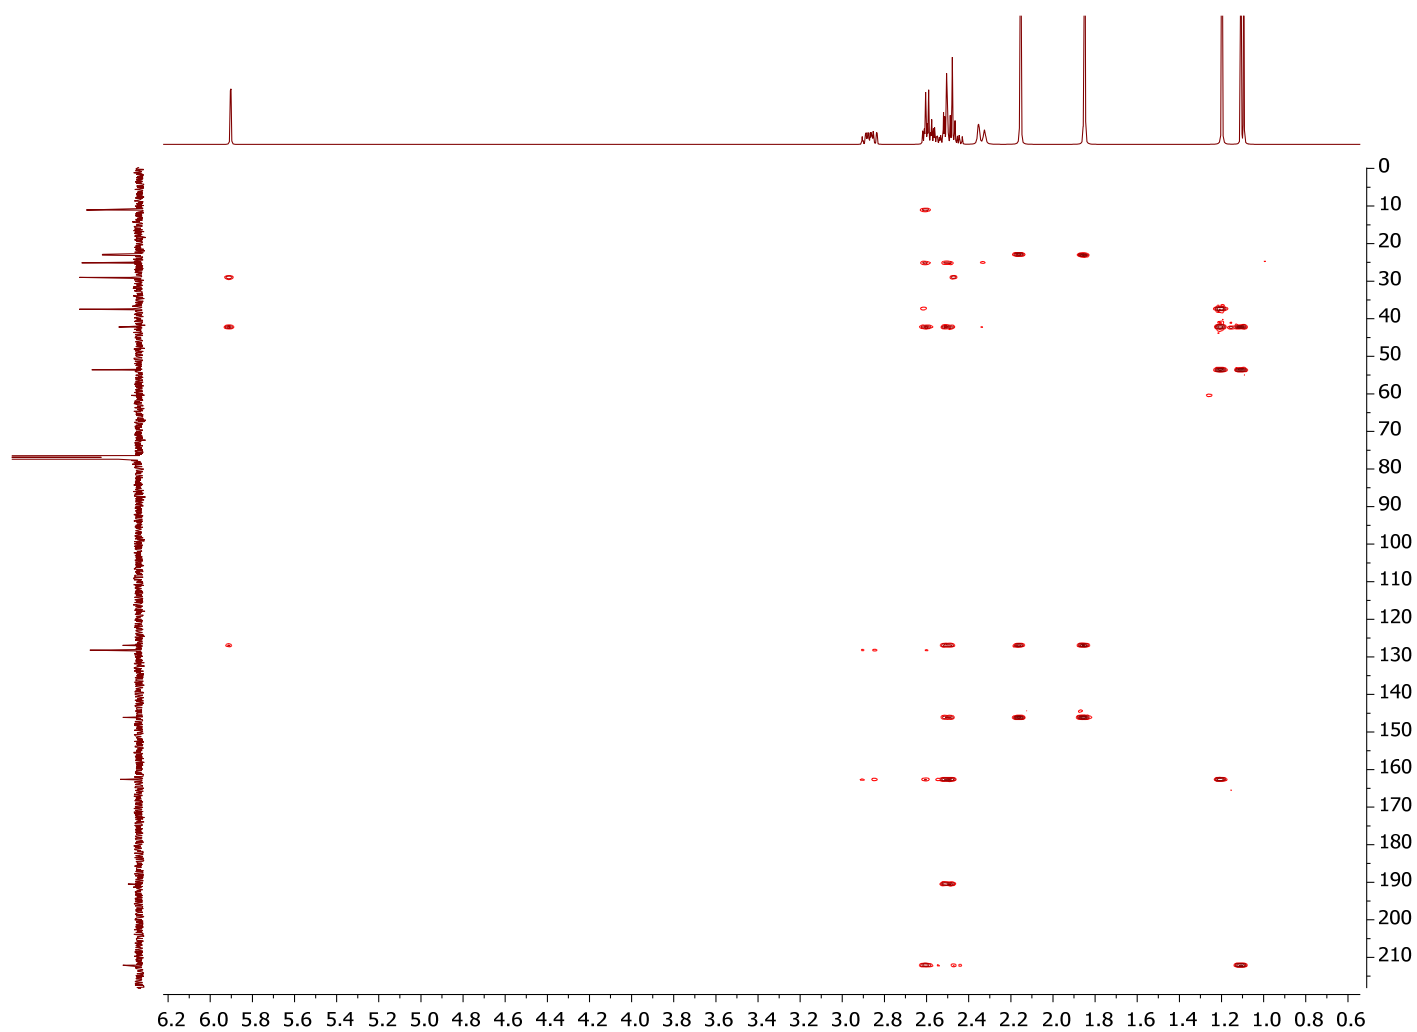

**Figure S19.** gHMBC spectrum of compound 3.



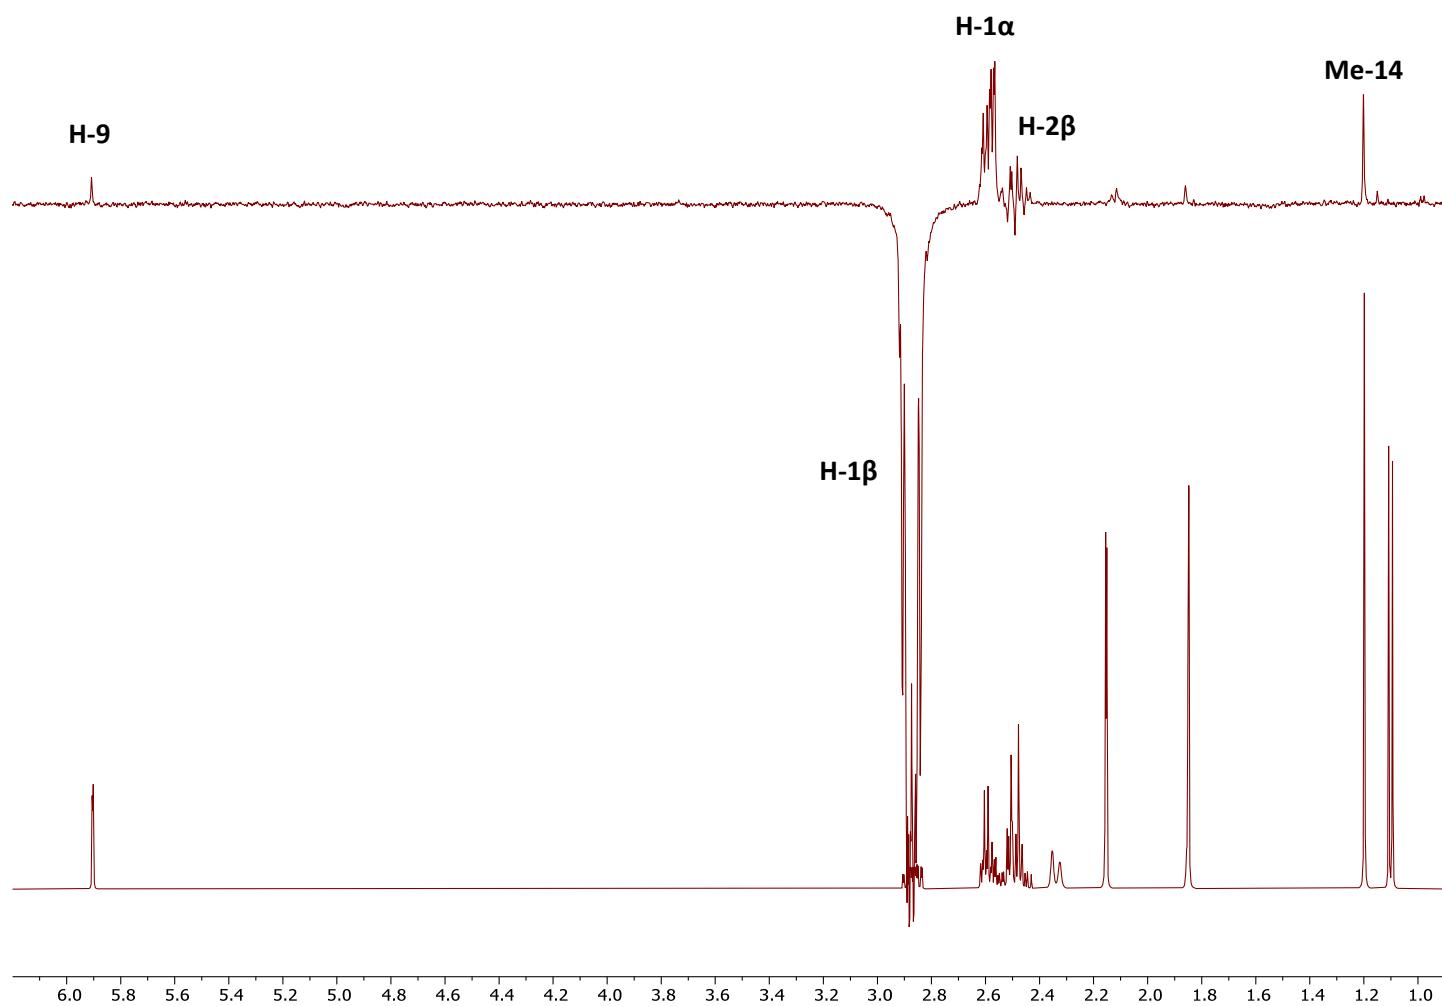

**Figure S20a.** 1D NOESY spectrum of compound **3**.

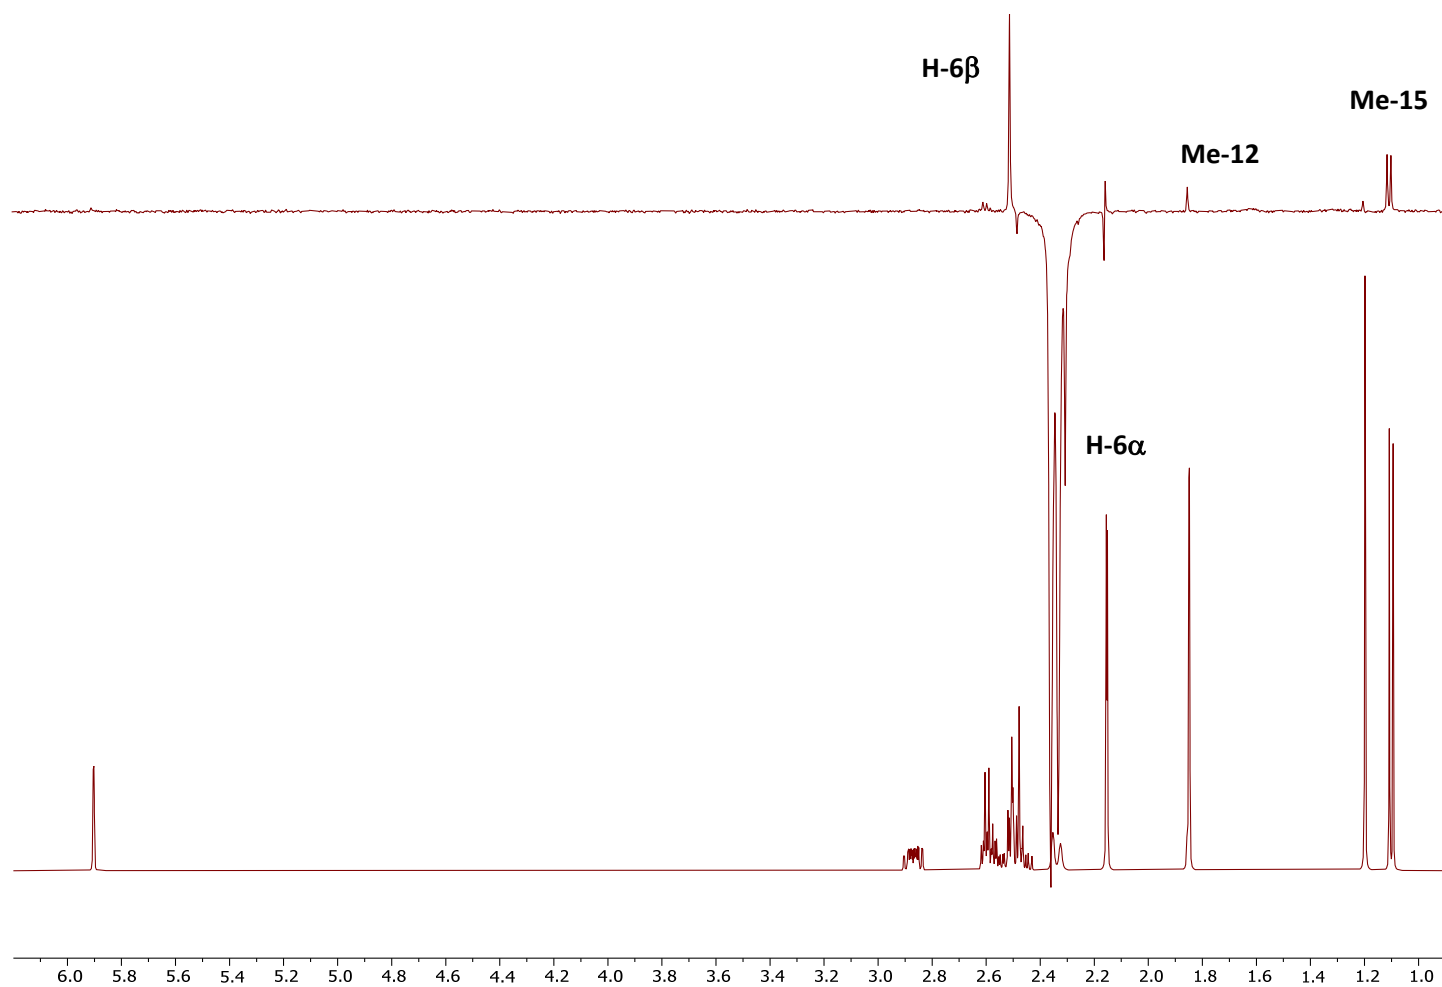

**Figure S20b.** 1D NOESY spectrum of compound **3**.

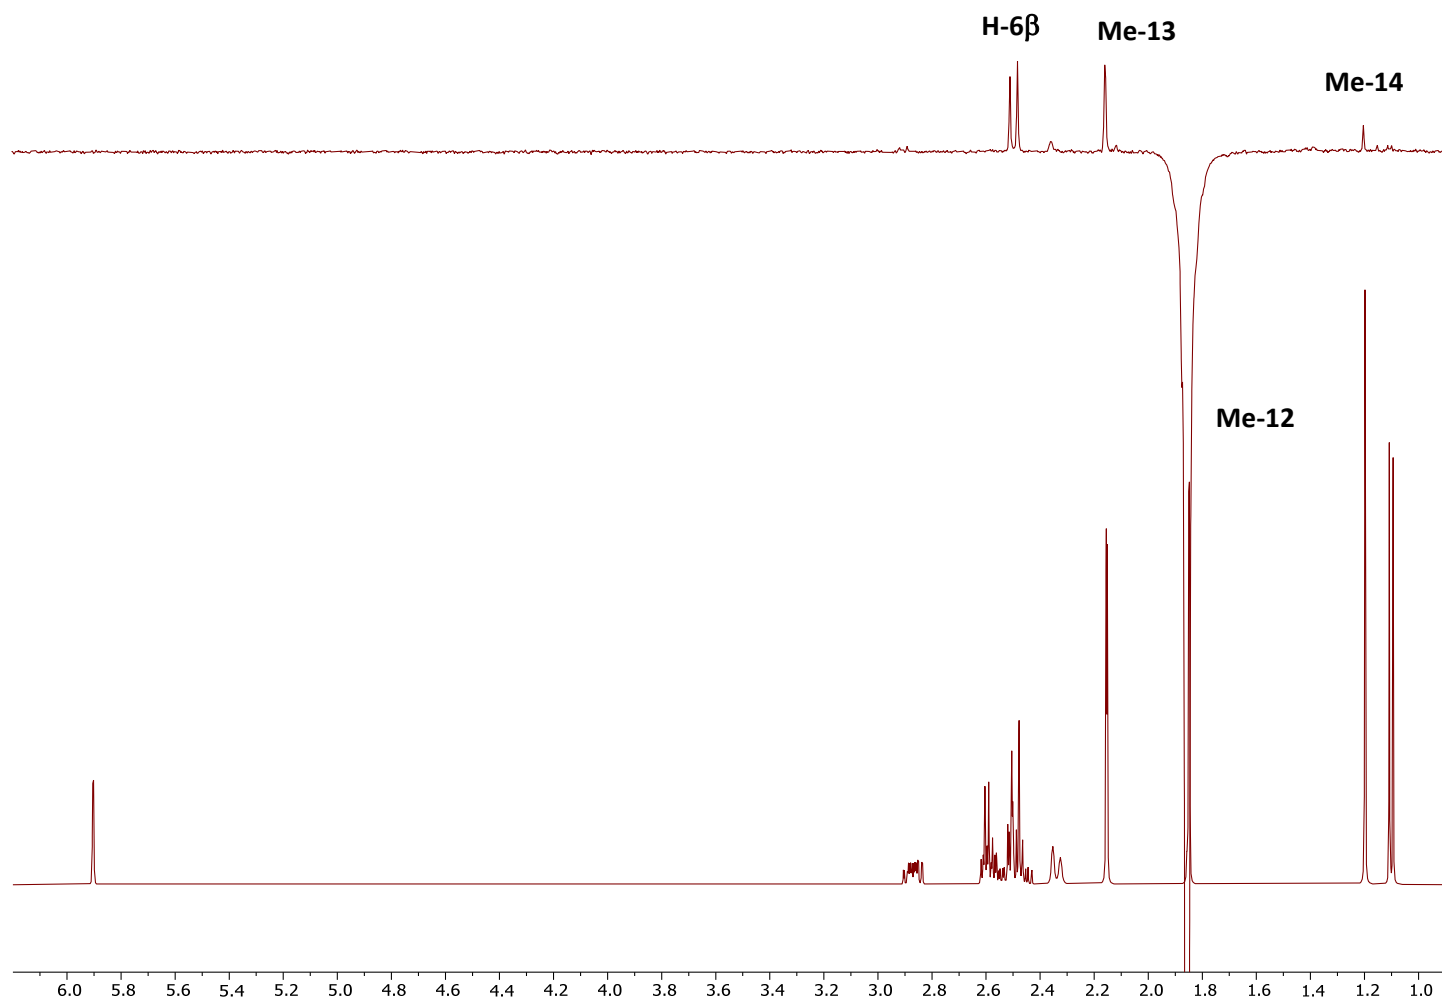

**Figure S20c.** 1D NOESY spectrum of compound **3**.

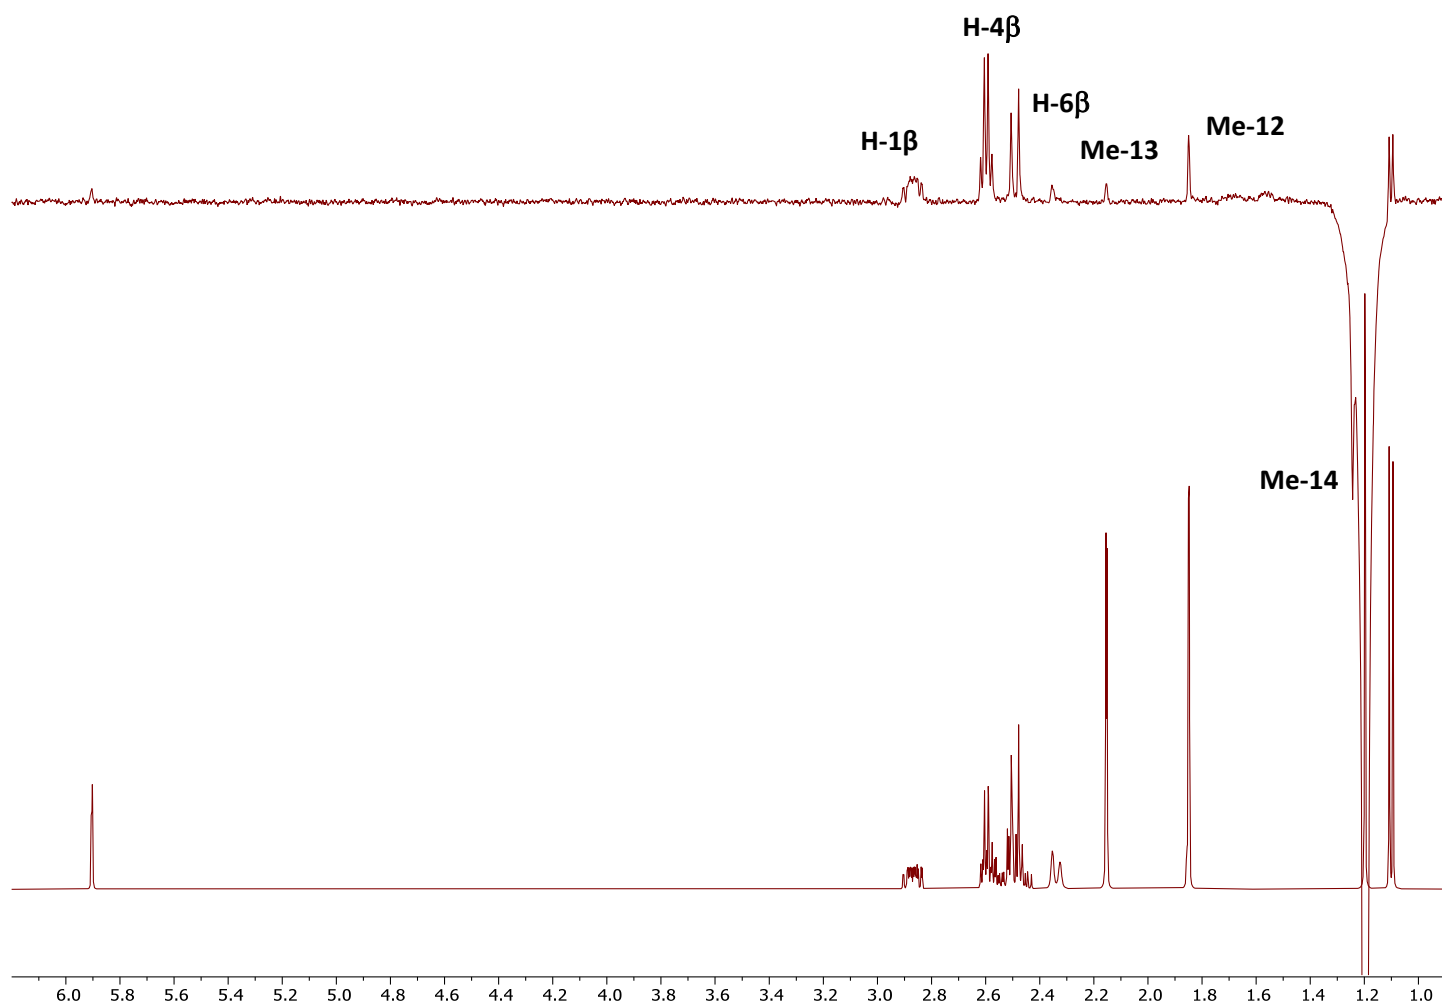

**Figure S20d.** 1D NOESY spectrum of compound **3**.

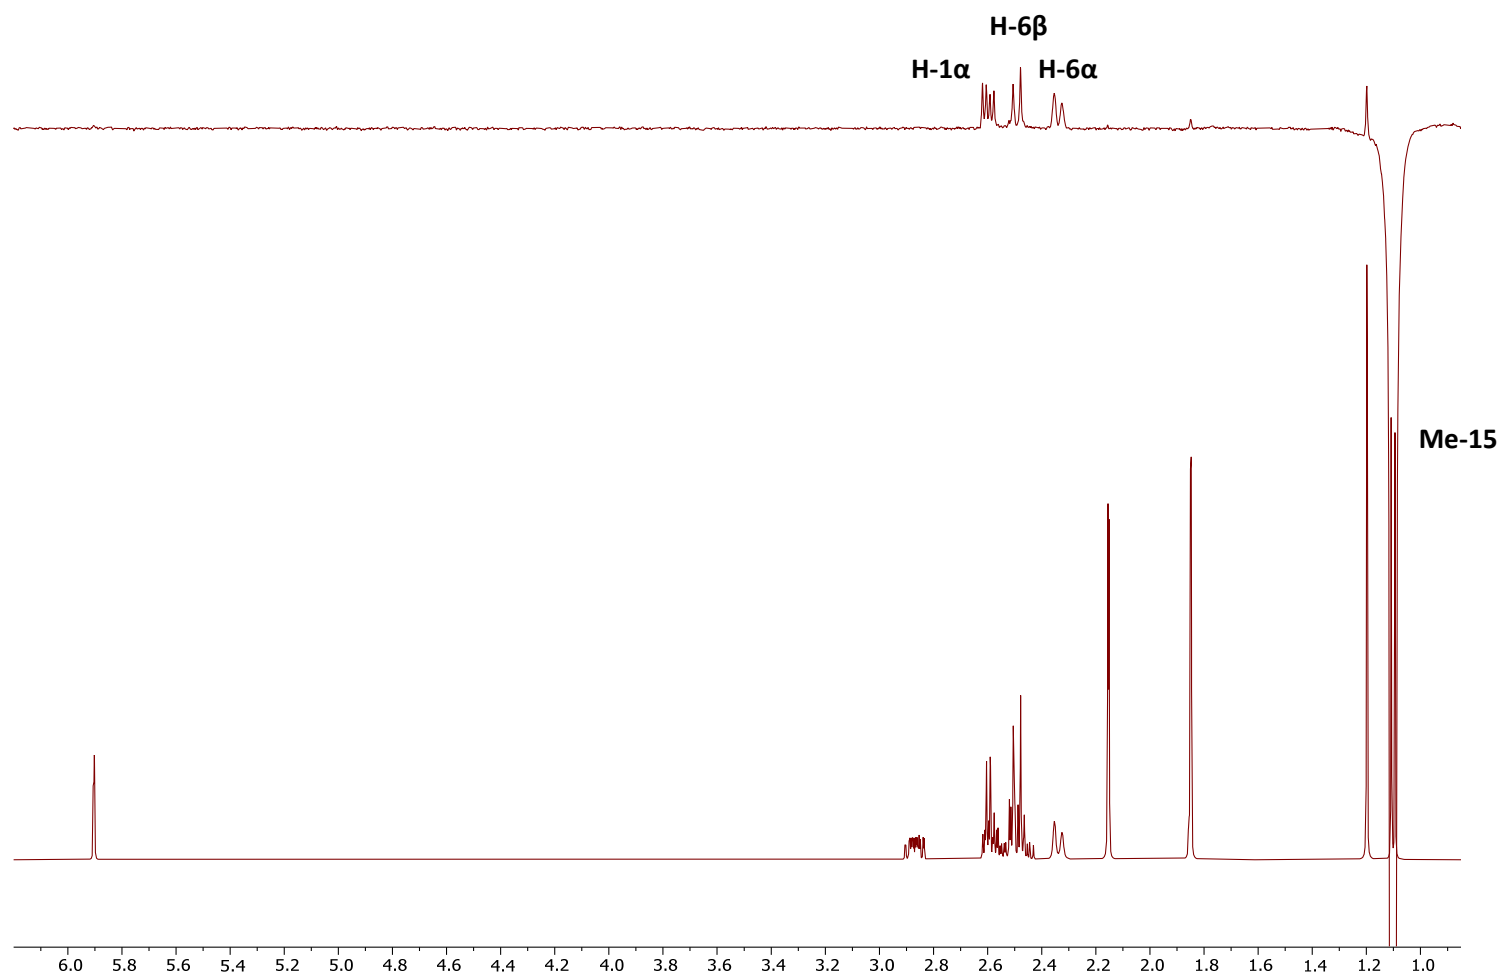

**Figure S20e.** 1D NOESY spectrum of compound **3**.

## Single Mass Analysis

Tolerance = 5.0 mDa / DBE: min = -1.5, max = 80.0

Element prediction: Off

Number of isotope peaks used for i-FIT = 3

Monoisotopic Mass, Even Electron Ions

36 formula(e) evaluated with 1 results within limits (up to 5 best isotopic matches for each mass)

Elements Used:

C: 0-100 H: 0-200 O: 0-50

CD1-40-P8 288 (2.670)

1: TOF MS ES+

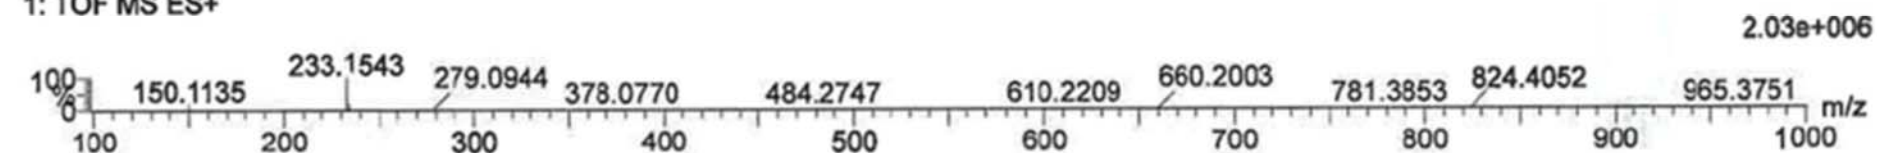

Minimum: -1.5  
Maximum: 5.0 10.0 80.0

| Mass     | Calc. Mass | mDa | PPM | DBE | i-FIT  | Norm | Conf (%) | Formula    |
|----------|------------|-----|-----|-----|--------|------|----------|------------|
| 233.1543 | 233.1542   | 0.1 | 0.4 | 5.5 | 1387.8 | n/a  | n/a      | C15 H21 O2 |

Figure S21. HRESIMS spectrum of compound 3.
